# Supplementary material for: SARS-CoV-2 Viral Load in the Nasopharynx at Time of First Infection Among Unvaccinated Individuals: A Secondary Cross-Protocol Analysis of 4 Randomized Trials
Source: PubMed Central journal article supplement (PMC11117088; doi:10.1001/jamanetworkopen.2024.12835), 2024-05-23
Supplement: jamanetwopen-e2412835-s002.pdf [file jamanetwopen-e2412835-s002.pdf]

\*First name, last name, and suffix (if applicable) are required and will appear in PubMed.

| <b>*Group Name(s): COVID-19 Prevention Network (COVPN)</b> |                   |                              |                         |                    |                                                 |                                                                |                                                                                                   |
|------------------------------------------------------------|-------------------|------------------------------|-------------------------|--------------------|-------------------------------------------------|----------------------------------------------------------------|---------------------------------------------------------------------------------------------------|
| <b>*First Name and Middle Initial(s)</b>                   | <b>*Last Name</b> | <b>*Suffix (eg, Jr, III)</b> | <b>Academic Degrees</b> | <b>Institution</b> | <b>Location (city, state/province, country)</b> | <b>Role or Contribution, eg, chair, principal investigator</b> | <b>Group (if more than 1 Group listed in the byline) and/or Subgroup (eg, Steering Committee)</b> |
| Atoya                                                      | Adams             |                              | MD, MBA                 |                    |                                                 |                                                                | COVID-19 Prevention Network                                                                       |
| Eric                                                       | Miller            |                              |                         |                    |                                                 |                                                                | COVID-19 Prevention Network                                                                       |
| Bruce G.                                                   | Rankin            |                              | DO                      |                    |                                                 |                                                                | COVID-19 Prevention Network                                                                       |
| Steven                                                     | Shinn             |                              | MD                      |                    |                                                 |                                                                | COVID-19 Prevention Network                                                                       |
| Dean                                                       | Follmann          |                              | PhD                     |                    |                                                 |                                                                | COVID-19 Prevention Network                                                                       |
| Jacqueline                                                 | Miller            |                              | MD                      |                    |                                                 |                                                                | COVID-19 Prevention Network                                                                       |
| Jerald                                                     | Sadoff            |                              | MD                      |                    |                                                 |                                                                | COVID-19 Prevention Network                                                                       |
| Marshall                                                   | Nash              |                              | MD                      |                    |                                                 |                                                                | COVID-19 Prevention Network                                                                       |
| Sinikka L.                                                 | Green             |                              | MD                      |                    |                                                 |                                                                | COVID-19 Prevention Network                                                                       |
| Colleen                                                    | Jacobsen          |                              |                         |                    |                                                 |                                                                | COVID-19 Prevention Network                                                                       |
| Jayasree                                                   | Krishnankutty     |                              |                         |                    |                                                 |                                                                | COVID-19 Prevention Network                                                                       |
| Sikhongi                                                   | Phungwayo         |                              |                         |                    |                                                 |                                                                | COVID-19 Prevention Network                                                                       |
| Richard M.                                                 | Glover            | II                           | MD                      |                    |                                                 |                                                                | COVID-19 Prevention Network                                                                       |
| Stacy                                                      | Slechta           |                              | DO                      |                    |                                                 |                                                                | COVID-19 Prevention Network                                                                       |
| Troy                                                       | Holdeman          |                              | MD                      |                    |                                                 |                                                                | COVID-19 Prevention Network                                                                       |
| Robyn                                                      | Hartvickson       |                              | MD                      |                    |                                                 |                                                                | COVID-19 Prevention Network                                                                       |
| Amber                                                      | Grant             |                              | APRN                    |                    |                                                 |                                                                | COVID-19 Prevention Network                                                                       |
| Terry L.                                                   | Poling            |                              | MD                      |                    |                                                 |                                                                | COVID-19 Prevention Network                                                                       |
| Terry D.                                                   | Klein             |                              | MD                      |                    |                                                 |                                                                | COVID-19 Prevention Network                                                                       |
| Thomas C.                                                  | Klein             |                              | MD                      |                    |                                                 |                                                                | COVID-19 Prevention Network                                                                       |
| Tracy R.                                                   | Klein             |                              | MD                      |                    |                                                 |                                                                | COVID-19 Prevention Network                                                                       |
| William B.                                                 | Smith             |                              | MD                      |                    |                                                 |                                                                | COVID-19 Prevention Network                                                                       |
| Richard L.                                                 | Gibson            |                              | MD                      |                    |                                                 |                                                                | COVID-19 Prevention Network                                                                       |
| Jennifer                                                   | Winbigler         |                              | MD                      |                    |                                                 |                                                                | COVID-19 Prevention Network                                                                       |
| Elizabeth                                                  | Parker            |                              | PA                      |                    |                                                 |                                                                | COVID-19 Prevention Network                                                                       |
| Priyantha N.                                               | Wijewardane       |                              | MD                      |                    |                                                 |                                                                | COVID-19 Prevention Network                                                                       |
| Eric                                                       | Bravo             |                              | MD                      |                    |                                                 |                                                                | COVID-19 Prevention Network                                                                       |
| Jeffrey                                                    | Thessing          |                              | MD                      |                    |                                                 |                                                                | COVID-19 Prevention Network                                                                       |
| Michelle                                                   | Maxwell           |                              | APRN                    |                    |                                                 |                                                                | COVID-19 Prevention Network                                                                       |
| Amanda                                                     | Horn              |                              | APRN                    |                    |                                                 |                                                                | COVID-19 Prevention Network                                                                       |
| Catherine                                                  | Mary Healy        |                              | MD                      |                    |                                                 |                                                                | COVID-19 Prevention Network                                                                       |
| Christine                                                  | Akamine           |                              | MD                      |                    |                                                 |                                                                | COVID-19 Prevention Network                                                                       |
| Laurence                                                   | Chu               |                              | MD                      |                    |                                                 |                                                                | COVID-19 Prevention Network                                                                       |
| R. Michelle                                                | Chouteau          |                              | MD                      |                    |                                                 |                                                                | COVID-19 Prevention Network                                                                       |
| Michael J.                                                 | Cotugno           |                              | MD                      |                    |                                                 |                                                                | COVID-19 Prevention Network                                                                       |
| George H.                                                  | Bauer             | Jr.                          | MD                      |                    |                                                 |                                                                | COVID-19 Prevention Network                                                                       |
| Greg                                                       | Hachigian         |                              | MD                      |                    |                                                 |                                                                | COVID-19 Prevention Network                                                                       |
| Masaru                                                     | Oshita            |                              | MD                      |                    |                                                 |                                                                | COVID-19 Prevention Network                                                                       |
| Michael                                                    | Cancilla          |                              | NP                      |                    |                                                 |                                                                | COVID-19 Prevention Network                                                                       |

## Supplemental Online Content: Nonauthor Collaborators

\*First name, last name, and suffix (if applicable) are required and will appear in PubMed.

| *First Name and Middle Initial(s) | *Last Name    | *Suffix (eg, Jr, III) | Academic Degrees | Institution | Location (city, state/province, country) | Role or Contribution, eg, chair, principal investigator | Group (if more than 1 Group listed in the byline) and/or Subgroup (eg, Steering Committee) |
|-----------------------------------|---------------|-----------------------|------------------|-------------|------------------------------------------|---------------------------------------------------------|--------------------------------------------------------------------------------------------|
| Kristen                           | Kiersey       |                       | NP               |             |                                          |                                                         | COVID-19 Prevention Network                                                                |
| William                           | Seger         |                       | MD               |             |                                          |                                                         | COVID-19 Prevention Network                                                                |
| Mohammed                          | Antwi         |                       |                  |             |                                          |                                                         | COVID-19 Prevention Network                                                                |
| Allison                           | Green         |                       |                  |             |                                          |                                                         | COVID-19 Prevention Network                                                                |
| Anthony                           | Kim           |                       |                  |             |                                          |                                                         | COVID-19 Prevention Network                                                                |
| Michael                           | Desjardins    |                       | MD               |             |                                          |                                                         | COVID-19 Prevention Network                                                                |
| Jennifer A.                       | Johnson       |                       | MD               |             |                                          |                                                         | COVID-19 Prevention Network                                                                |
| Amy                               | Sherman       |                       | MD               |             |                                          |                                                         | COVID-19 Prevention Network                                                                |
| Judith                            | Borger        |                       | DO               |             |                                          |                                                         | COVID-19 Prevention Network                                                                |
| Nafisa                            | Saleem        |                       | MD               |             |                                          |                                                         | COVID-19 Prevention Network                                                                |
| Joel                              | Solis         |                       | MD               |             |                                          |                                                         | COVID-19 Prevention Network                                                                |
| Martha                            | Carmen Medina |                       | PA-C             |             |                                          |                                                         | COVID-19 Prevention Network                                                                |
| Westly                            | Keating       |                       | PA-C             |             |                                          |                                                         | COVID-19 Prevention Network                                                                |
| Edgar                             | Garcia        |                       | PA-C             |             |                                          |                                                         | COVID-19 Prevention Network                                                                |
| Cynthia                           | Bueno         |                       | PA-C             |             |                                          |                                                         | COVID-19 Prevention Network                                                                |
| Nathan                            | Segall        |                       | MD               |             |                                          |                                                         | COVID-19 Prevention Network                                                                |
| Douglas S.                        | Denham        |                       | DO               |             |                                          |                                                         | COVID-19 Prevention Network                                                                |
| Thomas                            | Weiss         |                       | MD               |             |                                          |                                                         | COVID-19 Prevention Network                                                                |
| Ayoade                            | Avworo        |                       | DNP              |             |                                          |                                                         | COVID-19 Prevention Network                                                                |
| Parke                             | Hedges        |                       | MD               |             |                                          |                                                         | COVID-19 Prevention Network                                                                |
| Cynthia                           | Becher Strout |                       | MD               |             |                                          |                                                         | COVID-19 Prevention Network                                                                |
| Rica                              | Santiago      |                       |                  |             |                                          |                                                         | COVID-19 Prevention Network                                                                |
| Yvonne                            | Davis         |                       |                  |             |                                          |                                                         | COVID-19 Prevention Network                                                                |
| Patty                             | Howenstine    |                       |                  |             |                                          |                                                         | COVID-19 Prevention Network                                                                |
| Alison                            | Bondell       |                       |                  |             |                                          |                                                         | COVID-19 Prevention Network                                                                |
| Kristin                           | Marks         |                       | MS, MD           |             |                                          |                                                         | COVID-19 Prevention Network                                                                |
| Tina                              | Wang          |                       | MD               |             |                                          |                                                         | COVID-19 Prevention Network                                                                |
| Timothy                           | Wilkin        |                       | MD, MPH          |             |                                          |                                                         | COVID-19 Prevention Network                                                                |
| Mary                              | Vogler        |                       | MD               |             |                                          |                                                         | COVID-19 Prevention Network                                                                |
| Carrie                            | Johnston      |                       | MD, MS           |             |                                          |                                                         | COVID-19 Prevention Network                                                                |
| Michele P.                        | Andrasik      |                       | PhD              |             |                                          |                                                         | COVID-19 Prevention Network                                                                |
| Jessica G.                        | Andriesen     |                       | PhD              |             |                                          |                                                         | COVID-19 Prevention Network                                                                |
| Gail                              | Broder        |                       |                  |             |                                          |                                                         | COVID-19 Prevention Network                                                                |
| Niles                             | Eaton         |                       |                  |             |                                          |                                                         | COVID-19 Prevention Network                                                                |
| Huub G.                           | Gelderblom    |                       | MD, PhD, MPH     |             |                                          |                                                         | COVID-19 Prevention Network                                                                |
| Rachael                           | McClennen     |                       |                  |             |                                          |                                                         | COVID-19 Prevention Network                                                                |
| Nelson                            | Michael       |                       |                  |             |                                          |                                                         | COVID-19 Prevention Network                                                                |
| Merlin                            | Robb          |                       | MD               |             |                                          |                                                         | COVID-19 Prevention Network                                                                |
| Carrie                            | Sopher        |                       |                  |             |                                          |                                                         | COVID-19 Prevention Network                                                                |

## Supplemental Online Content: Nonauthor Collaborators

\*First name, last name, and suffix (if applicable) are required and will appear in PubMed.

| *First Name and Middle Initial(s) | *Last Name       | *Suffix (eg, Jr, III) | Academic Degrees | Institution | Location (city, state/province, country) | Role or Contribution, eg, chair, principal investigator | Group (if more than 1 Group listed in the byline) and/or Subgroup (eg, Steering Committee) |
|-----------------------------------|------------------|-----------------------|------------------|-------------|------------------------------------------|---------------------------------------------------------|--------------------------------------------------------------------------------------------|
| Vicki E.                          | Miller           |                       | MD, MPH          |             |                                          |                                                         | COVID-19 Prevention Network                                                                |
| Fredric                           | Santiago         |                       | MD               |             |                                          |                                                         | COVID-19 Prevention Network                                                                |
| Blanca                            | Gomez            |                       | FNP-C            |             |                                          |                                                         | COVID-19 Prevention Network                                                                |
| Insiya                            | Valika           |                       | PA-C             |             |                                          |                                                         | COVID-19 Prevention Network                                                                |
| Amy                               | Starr            |                       | FNP-C            |             |                                          |                                                         | COVID-19 Prevention Network                                                                |
| Valeria D.                        | Cantos           |                       | MD               |             |                                          |                                                         | COVID-19 Prevention Network                                                                |
| Sheetal                           | Kandiah          |                       | MD, MPH          |             |                                          |                                                         | COVID-19 Prevention Network                                                                |
| Carlos                            | del Rio          |                       | MD               |             |                                          |                                                         | COVID-19 Prevention Network                                                                |
| Srilatha                          | Edupuganti       |                       | MD               |             |                                          |                                                         | COVID-19 Prevention Network                                                                |
| Daniel S.                         | Graciaa          |                       | MD               |             |                                          |                                                         | COVID-19 Prevention Network                                                                |
| Evan J.                           | Anderson         |                       | MD               |             |                                          |                                                         | COVID-19 Prevention Network                                                                |
| Andres                            | Camacho-Gonzalez |                       | MD               |             |                                          |                                                         | COVID-19 Prevention Network                                                                |
| Satoshi                           | Kamidani         |                       | MD               |             |                                          |                                                         | COVID-19 Prevention Network                                                                |
| Christiana A.                     | Rostad           |                       | MD               |             |                                          |                                                         | COVID-19 Prevention Network                                                                |
| Meghan                            | Teherani         |                       | MD               |             |                                          |                                                         | COVID-19 Prevention Network                                                                |
| David J.                          | Diemert          |                       | MD               |             |                                          |                                                         | COVID-19 Prevention Network                                                                |
| Elissa                            | Malkin           |                       |                  |             |                                          |                                                         | COVID-19 Prevention Network                                                                |
| Marc                              | Siegel           |                       |                  |             |                                          |                                                         | COVID-19 Prevention Network                                                                |
| Afsoon                            | Roberts          |                       |                  |             |                                          |                                                         | COVID-19 Prevention Network                                                                |
| Gary                              | Simon            |                       |                  |             |                                          |                                                         | COVID-19 Prevention Network                                                                |
| Bindu                             | Balani           |                       | MD               |             |                                          |                                                         | COVID-19 Prevention Network                                                                |
| Carolene                          | Stephenson       |                       |                  |             |                                          |                                                         | COVID-19 Prevention Network                                                                |
| Steven                            | Sperber          |                       |                  |             |                                          |                                                         | COVID-19 Prevention Network                                                                |
| Cristina                          | Cicogna          |                       |                  |             |                                          |                                                         | COVID-19 Prevention Network                                                                |
| Marcus J.                         | Zervos           |                       | MD               |             |                                          |                                                         | COVID-19 Prevention Network                                                                |
| Paul                              | Kilgore          |                       | MD, MPH          |             |                                          |                                                         | COVID-19 Prevention Network                                                                |
| Mayur                             | Ramesh           |                       | MD               |             |                                          |                                                         | COVID-19 Prevention Network                                                                |
| Erica                             | Herc             |                       | MD               |             |                                          |                                                         | COVID-19 Prevention Network                                                                |
| Kate                              | Zenlea           |                       | MPH              |             |                                          |                                                         | COVID-19 Prevention Network                                                                |
| Abram                             | Burgher          |                       | MD               |             |                                          |                                                         | COVID-19 Prevention Network                                                                |
| Ann M.                            | Milliken         |                       |                  |             |                                          |                                                         | COVID-19 Prevention Network                                                                |
| Joseph D.                         | Davis            |                       | MD               |             |                                          |                                                         | COVID-19 Prevention Network                                                                |
| Brendan                           | Levy             |                       |                  |             |                                          |                                                         | COVID-19 Prevention Network                                                                |
| Sandra                            | Kelman           |                       |                  |             |                                          |                                                         | COVID-19 Prevention Network                                                                |
| Matthew W.                        | Doust            |                       | MD               |             |                                          |                                                         | COVID-19 Prevention Network                                                                |
| Denise                            | Sample           |                       |                  |             |                                          |                                                         | COVID-19 Prevention Network                                                                |
| Sandra                            | Erickson         |                       |                  |             |                                          |                                                         | COVID-19 Prevention Network                                                                |
| Shane G.                          | Christensen      |                       | MD               |             |                                          |                                                         | COVID-19 Prevention Network                                                                |
| Christopher                       | Matich           |                       |                  |             |                                          |                                                         | COVID-19 Prevention Network                                                                |
| James                             | Longe            |                       |                  |             |                                          |                                                         | COVID-19 Prevention Network                                                                |

## Supplemental Online Content: Nonauthor Collaborators

\*First name, last name, and suffix (if applicable) are required and will appear in PubMed.

| *First Name and Middle Initial(s) | *Last Name    | *Suffix (eg, Jr, III) | Academic Degrees | Institution | Location (city, state/province, country) | Role or Contribution, eg, chair, principal investigator | Group (if more than 1 Group listed in the byline) and/or Subgroup (eg, Steering Committee) |
|-----------------------------------|---------------|-----------------------|------------------|-------------|------------------------------------------|---------------------------------------------------------|--------------------------------------------------------------------------------------------|
| John                              | Witbeck       |                       |                  |             |                                          |                                                         | COVID-19 Prevention Network                                                                |
| James T.                          | Peterson      |                       | MD               |             |                                          |                                                         | COVID-19 Prevention Network                                                                |
| Alexander                         | Clark         |                       |                  |             |                                          |                                                         | COVID-19 Prevention Network                                                                |
| Gerald                            | Kelty         |                       |                  |             |                                          |                                                         | COVID-19 Prevention Network                                                                |
| Issac                             | Pena-Renteria |                       |                  |             |                                          |                                                         | COVID-19 Prevention Network                                                                |
| Michael J.                        | Koren         |                       | MD               |             |                                          |                                                         | COVID-19 Prevention Network                                                                |
| Darlene                           | Bartilucci    |                       | MD               |             |                                          |                                                         | COVID-19 Prevention Network                                                                |
| Alpa                              | Patel         |                       | MD               |             |                                          |                                                         | COVID-19 Prevention Network                                                                |
| Carolyn                           | Tran          |                       | MD               |             |                                          |                                                         | COVID-19 Prevention Network                                                                |
| Christina                         | Kennelly      |                       | MD               |             |                                          |                                                         | COVID-19 Prevention Network                                                                |
| Robert                            | Brownlee      |                       |                  |             |                                          |                                                         | COVID-19 Prevention Network                                                                |
| Jacob                             | Coleman       |                       |                  |             |                                          |                                                         | COVID-19 Prevention Network                                                                |
| Hala                              | Webster       |                       |                  |             |                                          |                                                         | COVID-19 Prevention Network                                                                |
| Carlos A.                         | Fierro        |                       | MD               |             |                                          |                                                         | COVID-19 Prevention Network                                                                |
| Natalia                           | Leistner      |                       |                  |             |                                          |                                                         | COVID-19 Prevention Network                                                                |
| Amy                               | Thompson      |                       |                  |             |                                          |                                                         | COVID-19 Prevention Network                                                                |
| Celia                             | Gonzalez      |                       |                  |             |                                          |                                                         | COVID-19 Prevention Network                                                                |
| Lisa A                            | Jackson       |                       | MD, MPH          |             |                                          |                                                         | COVID-19 Prevention Network                                                                |
| Janice                            | Suyehira      |                       | MD               |             |                                          |                                                         | COVID-19 Prevention Network                                                                |
| Milton                            | Haber         |                       | MD               |             |                                          |                                                         | COVID-19 Prevention Network                                                                |
| Maria M.                          | Regalado      |                       | MD               |             |                                          |                                                         | COVID-19 Prevention Network                                                                |
| Veronica                          | Procasky      |                       | RN, JD           |             |                                          |                                                         | COVID-19 Prevention Network                                                                |
| Alisha                            | Lutat         |                       |                  |             |                                          |                                                         | COVID-19 Prevention Network                                                                |
| Carl P.                           | Griffin       |                       | MD               |             |                                          |                                                         | COVID-19 Prevention Network                                                                |
| Ripley R.                         | Hollister     |                       | MD               |             |                                          |                                                         | COVID-19 Prevention Network                                                                |
| Jeremy                            | Brown         |                       | DO               |             |                                          |                                                         | COVID-19 Prevention Network                                                                |
| Melody                            | Ronk          |                       | PA-C             |             |                                          |                                                         | COVID-19 Prevention Network                                                                |
| Wayne L.                          | Harper        |                       | MD               |             |                                          |                                                         | COVID-19 Prevention Network                                                                |
| Lisa                              | Cohen         |                       | DO               |             |                                          |                                                         | COVID-19 Prevention Network                                                                |
| Lynn                              | Eckert        |                       | PA-C             |             |                                          |                                                         | COVID-19 Prevention Network                                                                |
| Matthew                           | Hong          |                       | MD               |             |                                          |                                                         | COVID-19 Prevention Network                                                                |
| Rambod                            | Rouhbakhsh    |                       | MD, MBA          |             |                                          |                                                         | COVID-19 Prevention Network                                                                |
| Elizabeth                         | Danford       |                       | MD               |             |                                          |                                                         | COVID-19 Prevention Network                                                                |
| John                              | Johnson       |                       | MD               |             |                                          |                                                         | COVID-19 Prevention Network                                                                |
| Richard                           | Calderone     |                       | MD               |             |                                          |                                                         | COVID-19 Prevention Network                                                                |
| Shishir K.                        | Khetan        |                       | MD               |             |                                          |                                                         | COVID-19 Prevention Network                                                                |
| Oyebisi                           | Olanrewaju    |                       | AC-CRNP          |             |                                          |                                                         | COVID-19 Prevention Network                                                                |
| Nan                               | Zhai          |                       | NP-C             |             |                                          |                                                         | COVID-19 Prevention Network                                                                |
| Kimberly                          | Nieves        |                       | AC-CRNP          |             |                                          |                                                         | COVID-19 Prevention Network                                                                |
| Allison                           | O'Brien       |                       | AC-CRNP          |             |                                          |                                                         | COVID-19 Prevention Network                                                                |

## Supplemental Online Content: Nonauthor Collaborators

\*First name, last name, and suffix (if applicable) are required and will appear in PubMed.

| *First Name and Middle Initial(s) | *Last Name      | *Suffix (eg, Jr, III) | Academic Degrees | Institution | Location (city, state/province, country) | Role or Contribution, eg, chair, principal investigator | Group (if more than 1 Group listed in the byline) and/or Subgroup (eg, Steering Committee) |
|-----------------------------------|-----------------|-----------------------|------------------|-------------|------------------------------------------|---------------------------------------------------------|--------------------------------------------------------------------------------------------|
| Paul S                            | Bradley         |                       | MD               |             |                                          |                                                         | COVID-19 Prevention Network                                                                |
| Amanda                            | Lilienthal      |                       | MSN NP-C         |             |                                          |                                                         | COVID-19 Prevention Network                                                                |
| Jim                               | Callis          |                       | PA-C             |             |                                          |                                                         | COVID-19 Prevention Network                                                                |
| Adam B                            | Brosz           |                       | MD               |             |                                          |                                                         | COVID-19 Prevention Network                                                                |
| Andrea                            | Clement         |                       | PA               |             |                                          |                                                         | COVID-19 Prevention Network                                                                |
| Whitney                           | West            |                       | APRN             |             |                                          |                                                         | COVID-19 Prevention Network                                                                |
| Luke                              | Friesen         |                       | PA               |             |                                          |                                                         | COVID-19 Prevention Network                                                                |
| Paul                              | Cramer          |                       | APRN             |             |                                          |                                                         | COVID-19 Prevention Network                                                                |
| Frank S                           | Eder            |                       | MD               |             |                                          |                                                         | COVID-19 Prevention Network                                                                |
| Ryan                              | Little          |                       | FNP              |             |                                          |                                                         | COVID-19 Prevention Network                                                                |
| Victoria                          | Engler          |                       | FNP              |             |                                          |                                                         | COVID-19 Prevention Network                                                                |
| Heather                           | Rattenbury-Shaw |                       | DO               |             |                                          |                                                         | COVID-19 Prevention Network                                                                |
| David J.                          | Ensz            |                       | MD               |             |                                          |                                                         | COVID-19 Prevention Network                                                                |
| Allie                             | Oplinger        |                       |                  |             |                                          |                                                         | COVID-19 Prevention Network                                                                |
| Brandon J.                        | Essink          |                       | MD               |             |                                          |                                                         | COVID-19 Prevention Network                                                                |
| Jay                               | Meyer           |                       | MD               |             |                                          |                                                         | COVID-19 Prevention Network                                                                |
| Frederick                         | Raiser          | III                   | MD               |             |                                          |                                                         | COVID-19 Prevention Network                                                                |
| Kimberly                          | Mueller         |                       | APRN             |             |                                          |                                                         | COVID-19 Prevention Network                                                                |
| Keith W.                          | Vrbicky         |                       | MD               |             |                                          |                                                         | COVID-19 Prevention Network                                                                |
| Charles                           | Harper          |                       | MD               |             |                                          |                                                         | COVID-19 Prevention Network                                                                |
| Chelsie                           | Nutsch          |                       | MD               |             |                                          |                                                         | COVID-19 Prevention Network                                                                |
| Wendell                           | Lewis           | III                   | MD               |             |                                          |                                                         | COVID-19 Prevention Network                                                                |
| Cathy                             | Laflan          |                       | MD               |             |                                          |                                                         | COVID-19 Prevention Network                                                                |
| Jordan L.                         | Whatley         |                       | MD               |             |                                          |                                                         | COVID-19 Prevention Network                                                                |
| Nicole                            | Harrell         |                       | MD               |             |                                          |                                                         | COVID-19 Prevention Network                                                                |
| Amie                              | Shannon         |                       | MD               |             |                                          |                                                         | COVID-19 Prevention Network                                                                |
| Crystal                           | Rowell          |                       | APRN,<br>FNP-C   |             |                                          |                                                         | COVID-19 Prevention Network                                                                |
| Christopher                       | Dedon           |                       | APRN,<br>FNP-C   |             |                                          |                                                         | COVID-19 Prevention Network                                                                |
| Mamodikoe                         | Makhene         |                       | MD, MPH          |             |                                          |                                                         | COVID-19 Prevention Network                                                                |
| Gregory M.                        | Gottschlich     |                       | MD               |             |                                          |                                                         | COVID-19 Prevention Network                                                                |
| Kate                              | Harden          |                       | PA-C             |             |                                          |                                                         | COVID-19 Prevention Network                                                                |
| Melissa                           | Gottschlich     |                       | PA-C             |             |                                          |                                                         | COVID-19 Prevention Network                                                                |
| Mary                              | Smith           |                       | MSN, FNP-C       |             |                                          |                                                         | COVID-19 Prevention Network                                                                |
| Richard                           | Powell          |                       | MD               |             |                                          |                                                         | COVID-19 Prevention Network                                                                |
| Murray A.                         | Kimmel          |                       | DO               |             |                                          |                                                         | COVID-19 Prevention Network                                                                |
| Simmy                             | Pinto           |                       | MD               |             |                                          |                                                         | COVID-19 Prevention Network                                                                |
| Timothy P.                        | Vachris         |                       | MD               |             |                                          |                                                         | COVID-19 Prevention Network                                                                |

## Supplemental Online Content: Nonauthor Collaborators

\*First name, last name, and suffix (if applicable) are required and will appear in PubMed.

| *First Name and Middle Initial(s) | *Last Name     | *Suffix (eg, Jr, III) | Academic Degrees | Institution | Location (city, state/province, country) | Role or Contribution, eg, chair, principal investigator | Group (if more than 1 Group listed in the byline) and/or Subgroup (eg, Steering Committee) |
|-----------------------------------|----------------|-----------------------|------------------|-------------|------------------------------------------|---------------------------------------------------------|--------------------------------------------------------------------------------------------|
| Mark                              | Hutchens       |                       | MD               |             |                                          |                                                         | COVID-19 Prevention Network                                                                |
| Stephen                           | Daniels        |                       | DO               |             |                                          |                                                         | COVID-19 Prevention Network                                                                |
| Margaret                          | Wells          |                       | MD               |             |                                          |                                                         | COVID-19 Prevention Network                                                                |
| Mimi                              | Van Der Leden  |                       | MD, PhD          |             |                                          |                                                         | COVID-19 Prevention Network                                                                |
| Peta-Gay                          | Jackson-Booth  |                       | MD               |             |                                          |                                                         | COVID-19 Prevention Network                                                                |
| Mira                              | Baron          |                       | MD               |             |                                          |                                                         | COVID-19 Prevention Network                                                                |
| Pamela                            | Kane           |                       | DO               |             |                                          |                                                         | COVID-19 Prevention Network                                                                |
| Shannen                           | Seversen       |                       | PA-C             |             |                                          |                                                         | COVID-19 Prevention Network                                                                |
| Mara                              | Kryvicky       |                       | PA-C             |             |                                          |                                                         | COVID-19 Prevention Network                                                                |
| Julia                             | Lord           |                       | PA-C             |             |                                          |                                                         | COVID-19 Prevention Network                                                                |
| Jamshid                           | Saleh          |                       | MD               |             |                                          |                                                         | COVID-19 Prevention Network                                                                |
| Matthew                           | Miles          |                       |                  |             |                                          |                                                         | COVID-19 Prevention Network                                                                |
| Rafael                            | Lupercio       |                       |                  |             |                                          |                                                         | COVID-19 Prevention Network                                                                |
| John W.                           | McGettigan     | Jr.                   | MD               |             |                                          |                                                         | COVID-19 Prevention Network                                                                |
| Walter                            | Patton         |                       | MD               |             |                                          |                                                         | COVID-19 Prevention Network                                                                |
| Riemke                            | Brakema        |                       | MD               |             |                                          |                                                         | COVID-19 Prevention Network                                                                |
| Karin                             | Choquette      |                       | MSN, ABNP-C      |             |                                          |                                                         | COVID-19 Prevention Network                                                                |
| Jonlyn                            | McGettigan     |                       | MSN, RN          |             |                                          |                                                         | COVID-19 Prevention Network                                                                |
| Judith L.                         | Kirstein       |                       | MD               |             |                                          |                                                         | COVID-19 Prevention Network                                                                |
| Marcia                            | Bernard        |                       | NP               |             |                                          |                                                         | COVID-19 Prevention Network                                                                |
| Mary Beth                         | Manning        |                       | MD               |             |                                          |                                                         | COVID-19 Prevention Network                                                                |
| Joan                              | Rothenberg     |                       | MD               |             |                                          |                                                         | COVID-19 Prevention Network                                                                |
| Toby                              | Briskin        |                       | MD               |             |                                          |                                                         | COVID-19 Prevention Network                                                                |
| Denise                            | Roadman        |                       | PAC              |             |                                          |                                                         | COVID-19 Prevention Network                                                                |
| Sharita                           | Tedder-Edwards |                       | FNP              |             |                                          |                                                         | COVID-19 Prevention Network                                                                |
| Howard I.                         | Schwartz       |                       | MD               |             |                                          |                                                         | COVID-19 Prevention Network                                                                |
| Surisday                          | Mederos        |                       |                  |             |                                          |                                                         | COVID-19 Prevention Network                                                                |
| Shobha                            | Swaminathan    |                       | MD               |             |                                          |                                                         | COVID-19 Prevention Network                                                                |
| Amesika                           | Nyaku          |                       | MD, MS           |             |                                          |                                                         | COVID-19 Prevention Network                                                                |
| Tilly                             | Varughese      |                       | MD               |             |                                          |                                                         | COVID-19 Prevention Network                                                                |
| Michelle                          | DallaPiazza    |                       | MD               |             |                                          |                                                         | COVID-19 Prevention Network                                                                |
| Sharon E.                         | Frey           |                       | MD               |             |                                          |                                                         | COVID-19 Prevention Network                                                                |
| Irene                             | Graham         |                       | MD               |             |                                          |                                                         | COVID-19 Prevention Network                                                                |
| Getahun                           | Abate          |                       | MD, PhD, MSc     |             |                                          |                                                         | COVID-19 Prevention Network                                                                |
| Daniel                            | Hoft           |                       | MD, PhD          |             |                                          |                                                         | COVID-19 Prevention Network                                                                |
| Leland N.                         | Allen          | III                   | MD               |             |                                          |                                                         | COVID-19 Prevention Network                                                                |
| Leslie A.                         | Edwards        |                       | MSN, CRNP        |             |                                          |                                                         | COVID-19 Prevention Network                                                                |

## Supplemental Online Content: Nonauthor Collaborators

\*First name, last name, and suffix (if applicable) are required and will appear in PubMed.

| *First Name and Middle Initial(s) | *Last Name      | *Suffix (eg, Jr, III) | Academic Degrees | Institution | Location (city, state/province, country) | Role or Contribution, eg, chair, principal investigator | Group (if more than 1 Group listed in the byline) and/or Subgroup (eg, Steering Committee) |
|-----------------------------------|-----------------|-----------------------|------------------|-------------|------------------------------------------|---------------------------------------------------------|--------------------------------------------------------------------------------------------|
| William S.                        | Davis           | Jr.                   | MS, PA-C         |             |                                          |                                                         | COVID-19 Prevention Network                                                                |
| Jessica M.                        | Mena            |                       | PA               |             |                                          |                                                         | COVID-19 Prevention Network                                                                |
| Mark E.                           | Kutner          |                       | MD               |             |                                          |                                                         | COVID-19 Prevention Network                                                                |
| Jorge                             | Caso            |                       | MD, CPI          |             |                                          |                                                         | COVID-19 Prevention Network                                                                |
| Maria                             | Hernandez Moran |                       | APRN             |             |                                          |                                                         | COVID-19 Prevention Network                                                                |
| Marianela                         | Carvajal        |                       | APRN             |             |                                          |                                                         | COVID-19 Prevention Network                                                                |
| Janet                             | Mendez          |                       | APRN             |             |                                          |                                                         | COVID-19 Prevention Network                                                                |
| Larkin T.                         | Wadsworth       | III                   | MD               |             |                                          |                                                         | COVID-19 Prevention Network                                                                |
| Michael R.                        | Adams           |                       | MD               |             |                                          |                                                         | COVID-19 Prevention Network                                                                |
| Leslie                            | Iverson         |                       | PA               |             |                                          |                                                         | COVID-19 Prevention Network                                                                |
| Joseph L.                         | Newberg         |                       | MD               |             |                                          |                                                         | COVID-19 Prevention Network                                                                |
| Laura                             | Pearlman        |                       | MS, MD, MBA      |             |                                          |                                                         | COVID-19 Prevention Network                                                                |
| Paul J.                           | Nugent          |                       | DO               |             |                                          |                                                         | COVID-19 Prevention Network                                                                |
| Michele D.                        | Reynolds        |                       | MD               |             |                                          |                                                         | COVID-19 Prevention Network                                                                |
| Jennifer                          | Bashour         |                       | MD               |             |                                          |                                                         | COVID-19 Prevention Network                                                                |
| Robert                            | Schmidt         |                       | MD               |             |                                          |                                                         | COVID-19 Prevention Network                                                                |
| Neil P.                           | Sheth           |                       | MD               |             |                                          |                                                         | COVID-19 Prevention Network                                                                |
| Kenneth                           | Steil           |                       | DO               |             |                                          |                                                         | COVID-19 Prevention Network                                                                |
| Ramy J.                           | Toma            |                       | MD               |             |                                          |                                                         | COVID-19 Prevention Network                                                                |
| William                           | Kirby           |                       | MD               |             |                                          |                                                         | COVID-19 Prevention Network                                                                |
| Pink                              | Folmar          |                       | MD               |             |                                          |                                                         | COVID-19 Prevention Network                                                                |
| Samantha                          | Williams        |                       | NP               |             |                                          |                                                         | COVID-19 Prevention Network                                                                |
| Paul                              | Pickrell        |                       | MD               |             |                                          |                                                         | COVID-19 Prevention Network                                                                |
| Stefanie                          | Mott            |                       | FNP-C            |             |                                          |                                                         | COVID-19 Prevention Network                                                                |
| Carol Ann                         | Linebarger      |                       | MD               |             |                                          |                                                         | COVID-19 Prevention Network                                                                |
| Hussain                           | Malbari         |                       | MD               |             |                                          |                                                         | COVID-19 Prevention Network                                                                |
| David                             | Pampe           |                       | MD               |             |                                          |                                                         | COVID-19 Prevention Network                                                                |
| Veronica G.                       | Fragoso         |                       | MD               |             |                                          |                                                         | COVID-19 Prevention Network                                                                |
| Lisa                              | Holloway        |                       | MD               |             |                                          |                                                         | COVID-19 Prevention Network                                                                |
| Cecilia                           | McKeown-Bragas  |                       | MD               |             |                                          |                                                         | COVID-19 Prevention Network                                                                |
| Teresa                            | Becker          |                       | MD               |             |                                          |                                                         | COVID-19 Prevention Network                                                                |
| Barton G.                         | Williams        |                       | MD               |             |                                          |                                                         | COVID-19 Prevention Network                                                                |
| William H.                        | Jones           |                       | MD               |             |                                          |                                                         | COVID-19 Prevention Network                                                                |
| Jesse L.                          | Clark           |                       | MD               |             |                                          |                                                         | COVID-19 Prevention Network                                                                |
| Steven                            | Shoptaw         |                       | PhD              |             |                                          |                                                         | COVID-19 Prevention Network                                                                |
| Michele                           | Vertucci        |                       | PA, NP           |             |                                          |                                                         | COVID-19 Prevention Network                                                                |
| Will                              | Hernandez       |                       | NP               |             |                                          |                                                         | COVID-19 Prevention Network                                                                |
| Stephen A.                        | Spector         |                       | MD               |             |                                          |                                                         | COVID-19 Prevention Network                                                                |
| Amaran                            | Moodley         |                       | MD               |             |                                          |                                                         | COVID-19 Prevention Network                                                                |

## Supplemental Online Content: Nonauthor Collaborators

\*First name, last name, and suffix (if applicable) are required and will appear in PubMed.

| *First Name and Middle Initial(s) | *Last Name      | *Suffix (eg, Jr, III) | Academic Degrees | Institution | Location (city, state/province, country) | Role or Contribution, eg, chair, principal investigator | Group (if more than 1 Group listed in the byline) and/or Subgroup (eg, Steering Committee) |
|-----------------------------------|-----------------|-----------------------|------------------|-------------|------------------------------------------|---------------------------------------------------------|--------------------------------------------------------------------------------------------|
| Jill                              | Blumenthal      |                       | MD               |             |                                          |                                                         | COVID-19 Prevention Network                                                                |
| Lisa                              | Stangl          |                       | NP               |             |                                          |                                                         | COVID-19 Prevention Network                                                                |
| Karen                             | Deutsch         |                       | NP               |             |                                          |                                                         | COVID-19 Prevention Network                                                                |
| Kathleen M.                       | Mullane         |                       | DO, PharmD       |             |                                          |                                                         | COVID-19 Prevention Network                                                                |
| David                             | Pitrak          |                       | MD               |             |                                          |                                                         | COVID-19 Prevention Network                                                                |
| Cheryl                            | Nuss            |                       | FNP              |             |                                          |                                                         | COVID-19 Prevention Network                                                                |
| Judy                              | Pi              |                       | PharmD           |             |                                          |                                                         | COVID-19 Prevention Network                                                                |
| Carl                              | Fichtenbaum     |                       | MD               |             |                                          |                                                         | COVID-19 Prevention Network                                                                |
| Margaret                          | Powers-Fletcher |                       | PhD              |             |                                          |                                                         | COVID-19 Prevention Network                                                                |
| Michelle                          | Saemann         |                       | RN               |             |                                          |                                                         | COVID-19 Prevention Network                                                                |
| Sharon                            | Kohrs           |                       | RN               |             |                                          |                                                         | COVID-19 Prevention Network                                                                |
| Thomas B.                         | Campbell        |                       | MD               |             |                                          |                                                         | COVID-19 Prevention Network                                                                |
| Andrew                            | Lauria          |                       |                  |             |                                          |                                                         | COVID-19 Prevention Network                                                                |
| Jose C.                           | Mancilla        |                       |                  |             |                                          |                                                         | COVID-19 Prevention Network                                                                |
| Hillary                           | Dunlevy         |                       |                  |             |                                          |                                                         | COVID-19 Prevention Network                                                                |
| Richard M.                        | Novak           |                       | MD               |             |                                          |                                                         | COVID-19 Prevention Network                                                                |
| Andrea                            | Wendrow         |                       |                  |             |                                          |                                                         | COVID-19 Prevention Network                                                                |
| Scott                             | Borgetti        |                       |                  |             |                                          |                                                         | COVID-19 Prevention Network                                                                |
| Ben                               | Ladner          |                       |                  |             |                                          |                                                         | COVID-19 Prevention Network                                                                |
| Matthew                           | Laurens         |                       | MD               |             |                                          |                                                         | COVID-19 Prevention Network                                                                |
| Lisa                              | Chrisley        |                       |                  |             |                                          |                                                         | COVID-19 Prevention Network                                                                |
| Cheryl                            | Young           |                       |                  |             |                                          |                                                         | COVID-19 Prevention Network                                                                |
| Susanne                           | Doblecki-Lewis  |                       | MD               |             |                                          |                                                         | COVID-19 Prevention Network                                                                |
| Maria L.                          | Alcaide         |                       |                  |             |                                          |                                                         | COVID-19 Prevention Network                                                                |
| Jose                              | Gonzales-Zamora |                       |                  |             |                                          |                                                         | COVID-19 Prevention Network                                                                |
| Stephen                           | Morris          |                       |                  |             |                                          |                                                         | COVID-19 Prevention Network                                                                |
| David                             | Wohl            |                       | MD               |             |                                          |                                                         | COVID-19 Prevention Network                                                                |
| Joseph                            | Eron            | Jr.                   | MD               |             |                                          |                                                         | COVID-19 Prevention Network                                                                |
| Ian                               | Frank           |                       | MD               |             |                                          |                                                         | COVID-19 Prevention Network                                                                |
| Debora                            | Dunbar          |                       |                  |             |                                          |                                                         | COVID-19 Prevention Network                                                                |
| David                             | Metzger         |                       |                  |             |                                          |                                                         | COVID-19 Prevention Network                                                                |
| Florence                          | Momplaisir      |                       |                  |             |                                          |                                                         | COVID-19 Prevention Network                                                                |
| Judith                            | Martin          |                       | MD               |             |                                          |                                                         | COVID-19 Prevention Network                                                                |
| Alejandro                         | Hoberman        |                       | MD               |             |                                          |                                                         | COVID-19 Prevention Network                                                                |
| Timothy                           | Shope           |                       | MD, MPH          |             |                                          |                                                         | COVID-19 Prevention Network                                                                |
| Gysella                           | Muniz           |                       | MD               |             |                                          |                                                         | COVID-19 Prevention Network                                                                |
| Richard                           | Rupp            |                       | MD               |             |                                          |                                                         | COVID-19 Prevention Network                                                                |
| Amber                             | Stanford        |                       | PA-C             |             |                                          |                                                         | COVID-19 Prevention Network                                                                |
| Megan                             | Berman          |                       | MD               |             |                                          |                                                         | COVID-19 Prevention Network                                                                |



## Supplemental Online Content: Nonauthor Collaborators

\*First name, last name, and suffix (if applicable) are required and will appear in PubMed.

| *First Name and Middle Initial(s) | *Last Name  | *Suffix (eg, Jr, III) | Academic Degrees       | Institution | Location (city, state/province, country) | Role or Contribution, eg, chair, principal investigator | Group (if more than 1 Group listed in the byline) and/or Subgroup (eg, Steering Committee) |
|-----------------------------------|-------------|-----------------------|------------------------|-------------|------------------------------------------|---------------------------------------------------------|--------------------------------------------------------------------------------------------|
| Laura                             | Porterfield |                       | MD                     |             |                                          |                                                         | COVID-19 Prevention Network                                                                |
| Michael                           | Lewis       |                       | MD                     |             |                                          |                                                         | COVID-19 Prevention Network                                                                |
| Elham                             | Ghadishah   |                       |                        |             |                                          |                                                         | COVID-19 Prevention Network                                                                |
| Joseph                            | Yusin       |                       |                        |             |                                          |                                                         | COVID-19 Prevention Network                                                                |
| Mai                               | Pham        |                       |                        |             |                                          |                                                         | COVID-19 Prevention Network                                                                |
| Clarence B.                       | Creech      | II                    | MD                     |             |                                          |                                                         | COVID-19 Prevention Network                                                                |
| Shannon                           | Walker      |                       | MD                     |             |                                          |                                                         | COVID-19 Prevention Network                                                                |
| Stephanie                         | Rolsma      |                       | MD, PhD                |             |                                          |                                                         | COVID-19 Prevention Network                                                                |
| Robert                            | Samuels     |                       |                        |             |                                          |                                                         | COVID-19 Prevention Network                                                                |
| Isaac                             | Thomsen     |                       | MD                     |             |                                          |                                                         | COVID-19 Prevention Network                                                                |
| Spyros A.                         | Kalams      |                       | MD                     |             |                                          |                                                         | COVID-19 Prevention Network                                                                |
| Greg                              | Wilson      |                       | MD                     |             |                                          |                                                         | COVID-19 Prevention Network                                                                |
| Gregg H.                          | Lucksinger  |                       | MD                     |             |                                          |                                                         | COVID-19 Prevention Network                                                                |
| Kevin                             | Parks       |                       | MD                     |             |                                          |                                                         | COVID-19 Prevention Network                                                                |
| Ryan                              | Israelsen   |                       | MD                     |             |                                          |                                                         | COVID-19 Prevention Network                                                                |
| Jaleh                             | Ostovar     |                       | FNP-C                  |             |                                          |                                                         | COVID-19 Prevention Network                                                                |
| Kary                              | Kelly       |                       | FNP-C                  |             |                                          |                                                         | COVID-19 Prevention Network                                                                |
| Jeffrey S.                        | Overcash    |                       | MD                     |             |                                          |                                                         | COVID-19 Prevention Network                                                                |
| Hanh                              | Chu         |                       |                        |             |                                          |                                                         | COVID-19 Prevention Network                                                                |
| Kia                               | Lee         |                       |                        |             |                                          |                                                         | COVID-19 Prevention Network                                                                |
| Luis I.                           | De La Cruz  |                       | MD                     |             |                                          |                                                         | COVID-19 Prevention Network                                                                |
| Steve                             | Clemons     |                       |                        |             |                                          |                                                         | COVID-19 Prevention Network                                                                |
| Elizabeth                         | Everette    |                       |                        |             |                                          |                                                         | COVID-19 Prevention Network                                                                |
| Suzanna                           | Studdard    |                       |                        |             |                                          |                                                         | COVID-19 Prevention Network                                                                |
| Gowdhami                          | Mohan       |                       | MD                     |             |                                          |                                                         | COVID-19 Prevention Network                                                                |
| Stefanie                          | Tyson       |                       |                        |             |                                          |                                                         | COVID-19 Prevention Network                                                                |
| Alyssa-Kay                        | Peay        |                       |                        |             |                                          |                                                         | COVID-19 Prevention Network                                                                |
| Danyel                            | Johnson     |                       |                        |             |                                          |                                                         | COVID-19 Prevention Network                                                                |
| Gregory J.                        | Feldman     |                       | MD                     |             |                                          |                                                         | COVID-19 Prevention Network                                                                |
| May-Yin                           | Suen        |                       |                        |             |                                          |                                                         | COVID-19 Prevention Network                                                                |
| Jacqueline                        | Muenzner    |                       |                        |             |                                          |                                                         | COVID-19 Prevention Network                                                                |
| Joseph                            | Boscia      |                       |                        |             |                                          |                                                         | COVID-19 Prevention Network                                                                |
| Farhan                            | Siddiqui    |                       |                        |             |                                          |                                                         | COVID-19 Prevention Network                                                                |
| John                              | Sanders     |                       | MD, PhD                |             |                                          |                                                         | COVID-19 Prevention Network                                                                |
| James                             | Peacock     |                       | MD                     |             |                                          |                                                         | COVID-19 Prevention Network                                                                |
| Julio                             | Nasim       |                       | MD                     |             |                                          |                                                         | COVID-19 Prevention Network                                                                |
| Michael L.                        | Levin       |                       | MD                     |             |                                          |                                                         | COVID-19 Prevention Network                                                                |
| Julie                             | Hussey      |                       | MSN,<br>APRN,<br>FNP-C |             |                                          |                                                         | COVID-19 Prevention Network                                                                |

## Supplemental Online Content: Nonauthor Collaborators

\*First name, last name, and suffix (if applicable) are required and will appear in PubMed.

| *First Name and Middle Initial(s) | *Last Name | *Suffix (eg, Jr, III) | Academic Degrees | Institution | Location (city, state/province, country) | Role or Contribution, eg, chair, principal investigator | Group (if more than 1 Group listed in the byline) and/or Subgroup (eg, Steering Committee) |
|-----------------------------------|------------|-----------------------|------------------|-------------|------------------------------------------|---------------------------------------------------------|--------------------------------------------------------------------------------------------|
| Marcy                             | Kulic      |                       | MD               |             |                                          |                                                         | COVID-19 Prevention Network                                                                |
| Mark M.                           | McKenzie   |                       | MD               |             |                                          |                                                         | COVID-19 Prevention Network                                                                |
| Teresa                            | Deese      |                       |                  |             |                                          |                                                         | COVID-19 Prevention Network                                                                |
| Erica                             | Osmundsen  |                       |                  |             |                                          |                                                         | COVID-19 Prevention Network                                                                |
| Christy                           | Sweet      |                       |                  |             |                                          |                                                         | COVID-19 Prevention Network                                                                |
| Valentine M.                      | Ebuh       |                       | MD, MA, MSc      |             |                                          |                                                         | COVID-19 Prevention Network                                                                |
| Elwaleed                          | Elnagar    |                       | MD               |             |                                          |                                                         | COVID-19 Prevention Network                                                                |
| Georgette                         | Ebuh       |                       | DNP, APRN, FNP-C |             |                                          |                                                         | COVID-19 Prevention Network                                                                |
| Genevieve                         | Iwuala     |                       | FNP              |             |                                          |                                                         | COVID-19 Prevention Network                                                                |
| Laurie J.                         | Han-Conrad |                       | MD               |             |                                          |                                                         | COVID-19 Prevention Network                                                                |
| Todd                              | Simmons    |                       | MD               |             |                                          |                                                         | COVID-19 Prevention Network                                                                |
| Denis                             | Tarakjian  |                       | MD               |             |                                          |                                                         | COVID-19 Prevention Network                                                                |
| Jeremy                            | Ackermann  |                       |                  |             |                                          |                                                         | COVID-19 Prevention Network                                                                |
| Mark S.                           | Adams      |                       |                  |             |                                          |                                                         | COVID-19 Prevention Network                                                                |
| José O.                           | Alemán     |                       |                  |             |                                          |                                                         | COVID-19 Prevention Network                                                                |
| Mohamed S.                        | Al-Ibrahim |                       |                  |             |                                          |                                                         | COVID-19 Prevention Network                                                                |
| David R.                          | Andes      |                       |                  |             |                                          |                                                         | COVID-19 Prevention Network                                                                |
| Jeb                               | Andrews    |                       |                  |             |                                          |                                                         | COVID-19 Prevention Network                                                                |
| Roberto C.                        | Arduino    |                       |                  |             |                                          |                                                         | COVID-19 Prevention Network                                                                |
| Martín                            | Bäcker     |                       |                  |             |                                          |                                                         | COVID-19 Prevention Network                                                                |
| Diana                             | Badillo    |                       |                  |             |                                          |                                                         | COVID-19 Prevention Network                                                                |
| Emma                              | Bainbridge |                       |                  |             |                                          |                                                         | COVID-19 Prevention Network                                                                |
| Teresa A.                         | Batteiger  |                       |                  |             |                                          |                                                         | COVID-19 Prevention Network                                                                |
| Jose A.                           | Bazan      |                       |                  |             |                                          |                                                         | COVID-19 Prevention Network                                                                |
| Roger J.                          | Bedimo     |                       |                  |             |                                          |                                                         | COVID-19 Prevention Network                                                                |
| Jorge A.                          | Benitez    |                       |                  |             |                                          |                                                         | COVID-19 Prevention Network                                                                |
| Annette R.                        | Bennett    |                       |                  |             |                                          |                                                         | COVID-19 Prevention Network                                                                |
| David I.                          | Bernstein  |                       |                  |             |                                          |                                                         | COVID-19 Prevention Network                                                                |
| Kristin                           | Bialobok   |                       |                  |             |                                          |                                                         | COVID-19 Prevention Network                                                                |
| Rebecca                           | Boas       |                       |                  |             |                                          |                                                         | COVID-19 Prevention Network                                                                |
| Judith                            | Brady      |                       |                  |             |                                          |                                                         | COVID-19 Prevention Network                                                                |
| Angela R.                         | Branche    |                       | MD               |             |                                          |                                                         | COVID-19 Prevention Network                                                                |
| Cynthia                           | Brown      |                       |                  |             |                                          |                                                         | COVID-19 Prevention Network                                                                |
| Catherine A.                      | Bunce      |                       |                  |             |                                          |                                                         | COVID-19 Prevention Network                                                                |
| Robert S.                         | Call       |                       |                  |             |                                          |                                                         | COVID-19 Prevention Network                                                                |
| Wesley                            | Campbell   |                       |                  |             |                                          |                                                         | COVID-19 Prevention Network                                                                |
| Ellie                             | Carmody    |                       |                  |             |                                          |                                                         | COVID-19 Prevention Network                                                                |

## Supplemental Online Content: Nonauthor Collaborators

\*First name, last name, and suffix (if applicable) are required and will appear in PubMed.

| *First Name and Middle Initial(s) | *Last Name            | *Suffix (eg, Jr, III) | Academic Degrees | Institution | Location (city, state/province, country) | Role or Contribution, eg, chair, principal investigator | Group (if more than 1 Group listed in the byline) and/or Subgroup (eg, Steering Committee) |
|-----------------------------------|-----------------------|-----------------------|------------------|-------------|------------------------------------------|---------------------------------------------------------|--------------------------------------------------------------------------------------------|
| Christopher                       | Carpenter             |                       |                  |             |                                          |                                                         | COVID-19 Prevention Network                                                                |
| Steven E.                         | Carsons               |                       |                  |             |                                          |                                                         | COVID-19 Prevention Network                                                                |
| Marvin                            | Castellon             |                       |                  |             |                                          |                                                         | COVID-19 Prevention Network                                                                |
| Mario                             | Castro                |                       |                  |             |                                          |                                                         | COVID-19 Prevention Network                                                                |
| Hannah                            | Catan                 |                       |                  |             |                                          |                                                         | COVID-19 Prevention Network                                                                |
| Jennifer                          | Chang                 |                       |                  |             |                                          |                                                         | COVID-19 Prevention Network                                                                |
| Mouna G.                          | Chebib                |                       |                  |             |                                          |                                                         | COVID-19 Prevention Network                                                                |
| Corey M.                          | Chen                  |                       |                  |             |                                          |                                                         | COVID-19 Prevention Network                                                                |
| Margaret                          | Cheng                 |                       |                  |             |                                          |                                                         | COVID-19 Prevention Network                                                                |
| Brian D. W.                       | Chow                  |                       |                  |             |                                          |                                                         | COVID-19 Prevention Network                                                                |
| Annie                             | Ciambruschini         |                       |                  |             |                                          |                                                         | COVID-19 Prevention Network                                                                |
| Joseph P.                         | Connor                |                       |                  |             |                                          |                                                         | COVID-19 Prevention Network                                                                |
| James H.                          | Conway                |                       |                  |             |                                          |                                                         | COVID-19 Prevention Network                                                                |
| Maureen                           | Cooney                |                       |                  |             |                                          |                                                         | COVID-19 Prevention Network                                                                |
| Marcel                            | Curlin                |                       |                  |             |                                          |                                                         | COVID-19 Prevention Network                                                                |
| Claudia                           | De La Matta Rodriguez |                       |                  |             |                                          |                                                         | COVID-19 Prevention Network                                                                |
| Jon F.                            | Dedon                 |                       |                  |             |                                          |                                                         | COVID-19 Prevention Network                                                                |
| Emily                             | Degan                 |                       |                  |             |                                          |                                                         | COVID-19 Prevention Network                                                                |
| Michelle                          | Dickey                |                       |                  |             |                                          |                                                         | COVID-19 Prevention Network                                                                |
| Craig                             | Dietz                 |                       |                  |             |                                          |                                                         | COVID-19 Prevention Network                                                                |
| Jennifer L                        | Dong                  |                       |                  |             |                                          |                                                         | COVID-19 Prevention Network                                                                |
| Brenda                            | Dorcely               |                       |                  |             |                                          |                                                         | COVID-19 Prevention Network                                                                |
| Michael P.                        | Dube                  |                       |                  |             |                                          |                                                         | COVID-19 Prevention Network                                                                |
| Carmel B.                         | Dyer                  |                       |                  |             |                                          |                                                         | COVID-19 Prevention Network                                                                |
| Benjamin                          | Eckhardt              |                       |                  |             |                                          |                                                         | COVID-19 Prevention Network                                                                |
| Edward                            | Ellerbeck             |                       |                  |             |                                          |                                                         | COVID-19 Prevention Network                                                                |
| Evan C.                           | Ewers                 |                       |                  |             |                                          |                                                         | COVID-19 Prevention Network                                                                |
| Amy                               | Falk                  |                       |                  |             |                                          |                                                         | COVID-19 Prevention Network                                                                |
| Brittany                          | Feijoo                |                       |                  |             |                                          |                                                         | COVID-19 Prevention Network                                                                |
| Uriel R.                          | Felsen                |                       |                  |             |                                          |                                                         | COVID-19 Prevention Network                                                                |
| Tom                               | Fiel                  |                       |                  |             |                                          |                                                         | COVID-19 Prevention Network                                                                |
| David                             | Fitz-Patrick          |                       |                  |             |                                          |                                                         | COVID-19 Prevention Network                                                                |
| Charles M.                        | Fogarty               |                       |                  |             |                                          |                                                         | COVID-19 Prevention Network                                                                |
| Stacy                             | Ford                  |                       |                  |             |                                          |                                                         | COVID-19 Prevention Network                                                                |
| Lina M.                           | Forero                |                       |                  |             |                                          |                                                         | COVID-19 Prevention Network                                                                |
| Elizabeth                         | Formentini            |                       |                  |             |                                          |                                                         | COVID-19 Prevention Network                                                                |
| Doris                             | Franco-Vitteri        |                       |                  |             |                                          |                                                         | COVID-19 Prevention Network                                                                |
| Robert W.                         | Frenck                | Jr.                   |                  |             |                                          |                                                         | COVID-19 Prevention Network                                                                |
| Elie                              | Gharib                |                       |                  |             |                                          |                                                         | COVID-19 Prevention Network                                                                |
| Suzanne                           | Gharib                |                       |                  |             |                                          |                                                         | COVID-19 Prevention Network                                                                |

## Supplemental Online Content: Nonauthor Collaborators

\*First name, last name, and suffix (if applicable) are required and will appear in PubMed.

| *First Name and Middle Initial(s) | *Last Name                   | *Suffix (eg, Jr, III) | Academic Degrees | Institution | Location (city, state/province, country) | Role or Contribution, eg, chair, principal investigator | Group (if more than 1 Group listed in the byline) and/or Subgroup (eg, Steering Committee) |
|-----------------------------------|------------------------------|-----------------------|------------------|-------------|------------------------------------------|---------------------------------------------------------|--------------------------------------------------------------------------------------------|
| Rola G.                           | Rucker                       |                       |                  |             |                                          |                                                         | COVID-19 Prevention Network                                                                |
| James N.                          | Goldenberg                   |                       |                  |             |                                          |                                                         | COVID-19 Prevention Network                                                                |
| Luis H.                           | González                     |                       |                  |             |                                          |                                                         | COVID-19 Prevention Network                                                                |
| Brett                             | Gray                         |                       |                  |             |                                          |                                                         | COVID-19 Prevention Network                                                                |
| Rusty                             | Greene                       |                       |                  |             |                                          |                                                         | COVID-19 Prevention Network                                                                |
| Robert M.                         | Grossberg                    |                       |                  |             |                                          |                                                         | COVID-19 Prevention Network                                                                |
| Juan V.                           | Guanira-Carranza             |                       |                  |             |                                          |                                                         | COVID-19 Prevention Network                                                                |
| Alfredo                           | Gilberto Guerreros Benavides |                       |                  |             |                                          |                                                         | COVID-19 Prevention Network                                                                |
| Clint C.                          | Guillory                     |                       |                  |             |                                          |                                                         | COVID-19 Prevention Network                                                                |
| Shauna H.                         | Gunaratne                    |                       |                  |             |                                          |                                                         | COVID-19 Prevention Network                                                                |
| David                             | Halpert                      |                       |                  |             |                                          |                                                         | COVID-19 Prevention Network                                                                |
| Holli                             | Hamilton                     |                       |                  |             |                                          |                                                         | COVID-19 Prevention Network                                                                |
| William R.                        | Hartman                      |                       |                  |             |                                          |                                                         | COVID-19 Prevention Network                                                                |
| Timothy J.                        | Hatlen                       |                       | MD               |             |                                          |                                                         | COVID-19 Prevention Network                                                                |
| Sheryl L.                         | Henderson                    |                       |                  |             |                                          |                                                         | COVID-19 Prevention Network                                                                |
| Ramin                             | Herati                       |                       |                  |             |                                          |                                                         | COVID-19 Prevention Network                                                                |
| Laura                             | Hernandez Guarin             |                       |                  |             |                                          |                                                         | COVID-19 Prevention Network                                                                |
| Robin                             | Hilder                       |                       |                  |             |                                          |                                                         | COVID-19 Prevention Network                                                                |
| Ken                               | Ho                           |                       |                  |             |                                          |                                                         | COVID-19 Prevention Network                                                                |
| Leila                             | Hojat                        |                       |                  |             |                                          |                                                         | COVID-19 Prevention Network                                                                |
| Sybil G.                          | Hosek                        |                       |                  |             |                                          |                                                         | COVID-19 Prevention Network                                                                |
| Jeffrey M.                        | Jacobson                     |                       |                  |             |                                          |                                                         | COVID-19 Prevention Network                                                                |
| Melanie                           | Jay                          |                       |                  |             |                                          |                                                         | COVID-19 Prevention Network                                                                |
| Diane H.                          | Johnson                      |                       |                  |             |                                          |                                                         | COVID-19 Prevention Network                                                                |
| Kathleen S.                       | Jones                        |                       |                  |             |                                          |                                                         | COVID-19 Prevention Network                                                                |
| Edward C.                         | Jones-López                  |                       |                  |             |                                          |                                                         | COVID-19 Prevention Network                                                                |
| Jessica E.                        | Justman                      |                       |                  |             |                                          |                                                         | COVID-19 Prevention Network                                                                |
| Scott                             | Kahney                       |                       |                  |             |                                          |                                                         | COVID-19 Prevention Network                                                                |
| Lois                              | Katz                         |                       |                  |             |                                          |                                                         | COVID-19 Prevention Network                                                                |
| Melinda                           | Katz                         |                       |                  |             |                                          |                                                         | COVID-19 Prevention Network                                                                |
| Daniel                            | Kaul                         |                       |                  |             |                                          |                                                         | COVID-19 Prevention Network                                                                |
| Michael C.                        | Keefer                       |                       |                  |             |                                          |                                                         | COVID-19 Prevention Network                                                                |
| Ashley                            | Kennedy                      |                       |                  |             |                                          |                                                         | COVID-19 Prevention Network                                                                |
| Jennifer                          | Knishinsky                   |                       |                  |             |                                          |                                                         | COVID-19 Prevention Network                                                                |
| Laura                             | Kogelman                     |                       |                  |             |                                          |                                                         | COVID-19 Prevention Network                                                                |
| Susan L.                          | Koletar                      |                       |                  |             |                                          |                                                         | COVID-19 Prevention Network                                                                |
| Angelica                          | Kottkamp                     |                       |                  |             |                                          |                                                         | COVID-19 Prevention Network                                                                |
| Maryrose                          | Laguio-Vila                  |                       |                  |             |                                          |                                                         | COVID-19 Prevention Network                                                                |
| Raphael J.                        | Landovitz                    |                       |                  |             |                                          |                                                         | COVID-19 Prevention Network                                                                |

## Supplemental Online Content: Nonauthor Collaborators

\*First name, last name, and suffix (if applicable) are required and will appear in PubMed.

| *First Name and Middle Initial(s) | *Last Name                | *Suffix (eg, Jr, III) | Academic Degrees | Institution | Location (city, state/province, country) | Role or Contribution, eg, chair, principal investigator | Group (if more than 1 Group listed in the byline) and/or Subgroup (eg, Steering Committee) |
|-----------------------------------|---------------------------|-----------------------|------------------|-------------|------------------------------------------|---------------------------------------------------------|--------------------------------------------------------------------------------------------|
| Jessica L.                        | Lee                       |                       |                  |             |                                          |                                                         | COVID-19 Prevention Network                                                                |
| Eneyda                            | Giuvanela Llerena Zegarra |                       |                  |             |                                          |                                                         | COVID-19 Prevention Network                                                                |
| Anna S.                           | Lok                       |                       |                  |             |                                          |                                                         | COVID-19 Prevention Network                                                                |
| James                             | Lovell                    |                       |                  |             |                                          |                                                         | COVID-19 Prevention Network                                                                |
| Ronald                            | Lubelchek                 |                       |                  |             |                                          |                                                         | COVID-19 Prevention Network                                                                |
| John                              | Lucaj                     |                       |                  |             |                                          |                                                         | COVID-19 Prevention Network                                                                |
| Gary                              | Luckasen                  |                       |                  |             |                                          |                                                         | COVID-19 Prevention Network                                                                |
| Annie                             | Luetkemeyer               |                       |                  |             |                                          |                                                         | COVID-19 Prevention Network                                                                |
| Njira                             | Lucia Lugogo              |                       |                  |             |                                          |                                                         | COVID-19 Prevention Network                                                                |
| Janine                            | Maenza                    |                       |                  |             |                                          |                                                         | COVID-19 Prevention Network                                                                |
| Carlos                            | Malvestutto               |                       |                  |             |                                          |                                                         | COVID-19 Prevention Network                                                                |
| Monica                            | Mauri                     |                       |                  |             |                                          |                                                         | COVID-19 Prevention Network                                                                |
| Ryan C.                           | Maves                     |                       |                  |             |                                          |                                                         | COVID-19 Prevention Network                                                                |
| Kenneth H.                        | Mayer                     |                       |                  |             |                                          |                                                         | COVID-19 Prevention Network                                                                |
| Michael J.                        | McCartney                 |                       |                  |             |                                          |                                                         | COVID-19 Prevention Network                                                                |
| Margaret E.                       | McCort                    |                       |                  |             |                                          |                                                         | COVID-19 Prevention Network                                                                |
| M. Juliana                        | McElrath                  |                       |                  |             |                                          |                                                         | COVID-19 Prevention Network                                                                |
| Meredith                          | McNairy                   |                       |                  |             |                                          |                                                         | COVID-19 Prevention Network                                                                |
| Fernando L.                       | Merino                    |                       |                  |             |                                          |                                                         | COVID-19 Prevention Network                                                                |
| Eric A.                           | Meyerowitz                |                       |                  |             |                                          |                                                         | COVID-19 Prevention Network                                                                |
| Carol L.                          | Mitchell                  |                       |                  |             |                                          |                                                         | COVID-19 Prevention Network                                                                |
| Cynthia L.                        | Monaco                    |                       |                  |             |                                          |                                                         | COVID-19 Prevention Network                                                                |
| Sauda                             | Muhammad                  |                       |                  |             |                                          |                                                         | COVID-19 Prevention Network                                                                |
| Sigridh                           | Muñoz-Gómez               |                       |                  |             |                                          |                                                         | COVID-19 Prevention Network                                                                |
| Sonal                             | Munsiff                   |                       |                  |             |                                          |                                                         | COVID-19 Prevention Network                                                                |
| Paul                              | Nee                       |                       |                  |             |                                          |                                                         | COVID-19 Prevention Network                                                                |
| Nicole L.                         | Nollen                    |                       |                  |             |                                          |                                                         | COVID-19 Prevention Network                                                                |
| Asif                              | Noor                      |                       |                  |             |                                          |                                                         | COVID-19 Prevention Network                                                                |
| Claudio                           | Nuñez Lagos               |                       |                  |             |                                          |                                                         | COVID-19 Prevention Network                                                                |
| Jason F.                          | Okulicz                   |                       |                  |             |                                          |                                                         | COVID-19 Prevention Network                                                                |
| Patrick A.                        | Oliver                    |                       |                  |             |                                          |                                                         | COVID-19 Prevention Network                                                                |
| Jessica                           | Ortega                    |                       |                  |             |                                          |                                                         | COVID-19 Prevention Network                                                                |
| Steven                            | Palmer                    |                       |                  |             |                                          |                                                         | COVID-19 Prevention Network                                                                |
| Lalitha                           | Parameswaran              |                       |                  |             |                                          |                                                         | COVID-19 Prevention Network                                                                |
| Purvi                             | Parikh                    |                       |                  |             |                                          |                                                         | COVID-19 Prevention Network                                                                |
| Susan                             | Parker                    |                       |                  |             |                                          |                                                         | COVID-19 Prevention Network                                                                |
| Reza                              | Parungao                  |                       |                  |             |                                          |                                                         | COVID-19 Prevention Network                                                                |
| Juana R.                          | Pavie                     |                       |                  |             |                                          |                                                         | COVID-19 Prevention Network                                                                |
| Rebecca P.                        | Madan                     |                       |                  |             |                                          |                                                         | COVID-19 Prevention Network                                                                |

## Supplemental Online Content: Nonauthor Collaborators

\*First name, last name, and suffix (if applicable) are required and will appear in PubMed.

| *First Name and Middle Initial(s) | *Last Name          | *Suffix (eg, Jr, III) | Academic Degrees | Institution | Location (city, state/province, country) | Role or Contribution, eg, chair, principal investigator | Group (if more than 1 Group listed in the byline) and/or Subgroup (eg, Steering Committee) |
|-----------------------------------|---------------------|-----------------------|------------------|-------------|------------------------------------------|---------------------------------------------------------|--------------------------------------------------------------------------------------------|
| Henry                             | Peralta             |                       |                  |             |                                          |                                                         | COVID-19 Prevention Network                                                                |
| Jennifer                          | Petts               |                       |                  |             |                                          |                                                         | COVID-19 Prevention Network                                                                |
| Kristen K.                        | Pierce              |                       |                  |             |                                          |                                                         | COVID-19 Prevention Network                                                                |
| E. Javier                         | Pretell Alva        |                       |                  |             |                                          |                                                         | COVID-19 Prevention Network                                                                |
| Lawrence J.                       | Purpura             |                       |                  |             |                                          |                                                         | COVID-19 Prevention Network                                                                |
| Vanessa                           | Raabe               |                       |                  |             |                                          |                                                         | COVID-19 Prevention Network                                                                |
| Sergio E.                         | Recuenco            |                       |                  |             |                                          |                                                         | COVID-19 Prevention Network                                                                |
| Tamara                            | Richards            |                       |                  |             |                                          |                                                         | COVID-19 Prevention Network                                                                |
| Sharon A.                         | Riddler             |                       |                  |             |                                          |                                                         | COVID-19 Prevention Network                                                                |
| Barbara                           | Rizzardi            |                       |                  |             |                                          |                                                         | COVID-19 Prevention Network                                                                |
| Rachel                            | Rokser              |                       |                  |             |                                          |                                                         | COVID-19 Prevention Network                                                                |
| Charlotte-Paige                   | Rolle               |                       |                  |             |                                          |                                                         | COVID-19 Prevention Network                                                                |
| Adam                              | Rosen               |                       |                  |             |                                          |                                                         | COVID-19 Prevention Network                                                                |
| Jeffrey                           | Rosen               |                       |                  |             |                                          |                                                         | COVID-19 Prevention Network                                                                |
| Lena R.                           | Freese              |                       |                  |             |                                          |                                                         | COVID-19 Prevention Network                                                                |
| María E.                          | Santolaya           |                       |                  |             |                                          |                                                         | COVID-19 Prevention Network                                                                |
| Linda M.                          | Schipani            |                       |                  |             |                                          |                                                         | COVID-19 Prevention Network                                                                |
| Adam                              | Schwartz            |                       |                  |             |                                          |                                                         | COVID-19 Prevention Network                                                                |
| Tiffany                           | Schwasinger-Schmidt |                       |                  |             |                                          |                                                         | COVID-19 Prevention Network                                                                |
| Hyman                             | Scott               |                       |                  |             |                                          |                                                         | COVID-19 Prevention Network                                                                |
| Beverly E.                        | Sha                 |                       |                  |             |                                          |                                                         | COVID-19 Prevention Network                                                                |
| Shivanjali                        | Shankaran           |                       |                  |             |                                          |                                                         | COVID-19 Prevention Network                                                                |
| Adrienne E.                       | Shapiro             |                       |                  |             |                                          |                                                         | COVID-19 Prevention Network                                                                |
| Stephan C.                        | Sharp               |                       |                  |             |                                          |                                                         | COVID-19 Prevention Network                                                                |
| Bo                                | Shopsin             |                       |                  |             |                                          |                                                         | COVID-19 Prevention Network                                                                |
| Matthew D.                        | Sims                |                       |                  |             |                                          |                                                         | COVID-19 Prevention Network                                                                |
| Stephanie                         | Skipper             |                       |                  |             |                                          |                                                         | COVID-19 Prevention Network                                                                |
| Derek M.                          | Smith               |                       |                  |             |                                          |                                                         | COVID-19 Prevention Network                                                                |
| Michael J.                        | Smith               |                       |                  |             |                                          |                                                         | COVID-19 Prevention Network                                                                |
| M. Mahdee                         | Sobhanie            |                       |                  |             |                                          |                                                         | COVID-19 Prevention Network                                                                |
| Brit                              | Sovic               |                       |                  |             |                                          |                                                         | COVID-19 Prevention Network                                                                |
| Stephanie                         | Sterling            |                       |                  |             |                                          |                                                         | COVID-19 Prevention Network                                                                |
| Robert                            | Striker             |                       |                  |             |                                          |                                                         | COVID-19 Prevention Network                                                                |
| Karla Beatriz                     | Tafur Bances        |                       |                  |             |                                          |                                                         | COVID-19 Prevention Network                                                                |
| Kawsar R.                         | Talaat              |                       |                  |             |                                          |                                                         | COVID-19 Prevention Network                                                                |
| Edward M.                         | Tavel               | Jr.                   |                  |             |                                          |                                                         | COVID-19 Prevention Network                                                                |
| Hong V                            | Tieu                |                       |                  |             |                                          |                                                         | COVID-19 Prevention Network                                                                |
| Christian                         | Tomaszewski         |                       |                  |             |                                          |                                                         | COVID-19 Prevention Network                                                                |
| Ryan                              | Tomlinson           |                       |                  |             |                                          |                                                         | COVID-19 Prevention Network                                                                |
| Juan P.                           | Torres              |                       |                  |             |                                          |                                                         | COVID-19 Prevention Network                                                                |

## Supplemental Online Content: Nonauthor Collaborators

\*First name, last name, and suffix (if applicable) are required and will appear in PubMed.

| *First Name and Middle Initial(s) | *Last Name       | *Suffix (eg, Jr, III) | Academic Degrees     | Institution | Location (city, state/province, country) | Role or Contribution, eg, chair, principal investigator | Group (if more than 1 Group listed in the byline) and/or Subgroup (eg, Steering Committee) |
|-----------------------------------|------------------|-----------------------|----------------------|-------------|------------------------------------------|---------------------------------------------------------|--------------------------------------------------------------------------------------------|
| Julian A.                         | Torres           |                       |                      |             |                                          |                                                         | COVID-19 Prevention Network                                                                |
| John J                            | Treanor          |                       |                      |             |                                          |                                                         | COVID-19 Prevention Network                                                                |
| Sade                              | Tukuru           |                       |                      |             |                                          |                                                         | COVID-19 Prevention Network                                                                |
| Robert J.                         | Ulrich           |                       |                      |             |                                          |                                                         | COVID-19 Prevention Network                                                                |
| Gregory C.                        | Utz              |                       |                      |             |                                          |                                                         | COVID-19 Prevention Network                                                                |
| Veronica                          | Viar             |                       |                      |             |                                          |                                                         | COVID-19 Prevention Network                                                                |
| Roberto A.                        | Viau Colindres   |                       |                      |             |                                          |                                                         | COVID-19 Prevention Network                                                                |
| Edward E.                         | Walsh            |                       |                      |             |                                          |                                                         | COVID-19 Prevention Network                                                                |
| Mary C.                           | Walsh            |                       |                      |             |                                          |                                                         | COVID-19 Prevention Network                                                                |
| Emmanuel B.                       | Walter           |                       |                      |             |                                          |                                                         | COVID-19 Prevention Network                                                                |
| Jessica L.                        | Weidler          |                       |                      |             |                                          |                                                         | COVID-19 Prevention Network                                                                |
| Yi H.                             | Wu               |                       |                      |             |                                          |                                                         | COVID-19 Prevention Network                                                                |
| Kinara S.                         | Yang             |                       |                      |             |                                          |                                                         | COVID-19 Prevention Network                                                                |
| Juan Luis                         | Yrivarren Giorza |                       |                      |             |                                          |                                                         | COVID-19 Prevention Network                                                                |
| Arthur L.                         | Zemanek          |                       |                      |             |                                          |                                                         | COVID-19 Prevention Network                                                                |
| Kevin                             | Zhang            |                       |                      |             |                                          |                                                         | COVID-19 Prevention Network                                                                |
| Barry S.                          | Zingman          |                       |                      |             |                                          |                                                         | COVID-19 Prevention Network                                                                |
| Richard                           | Gorman           |                       | MD                   |             |                                          |                                                         | COVID-19 Prevention Network                                                                |
| Carmen A.                         | Paez             |                       | MD, MBA              |             |                                          |                                                         | COVID-19 Prevention Network                                                                |
| Edith                             | Swann            |                       | PhD                  |             |                                          |                                                         | COVID-19 Prevention Network                                                                |
| Simbarashe G.                     | Takuva           |                       | MChB, MSc            |             |                                          |                                                         | COVID-19 Prevention Network                                                                |
| Alex                              | Greninger        |                       | MD, PhD, MS, Mphil   |             |                                          |                                                         | COVID-19 Prevention Network                                                                |
| Pavitra                           | Roychoudhury     |                       | PhD                  |             |                                          |                                                         | COVID-19 Prevention Network                                                                |
| Robert W.                         | Coombs           |                       | MD, PhD              |             |                                          |                                                         | COVID-19 Prevention Network                                                                |
| Keith R.                          | Jerome           |                       | MD, PhD              |             |                                          |                                                         | COVID-19 Prevention Network                                                                |
| Flora                             | Castellino       |                       | MD                   |             |                                          |                                                         | COVID-19 Prevention Network                                                                |
| Xiaomi                            | Tong             |                       | PhD                  |             |                                          |                                                         | COVID-19 Prevention Network                                                                |
| Corrina                           | Pavetto          |                       | MS, RAC              |             |                                          |                                                         | COVID-19 Prevention Network                                                                |
| Teletha                           | Gipson           |                       | PhD, MS              |             |                                          |                                                         | COVID-19 Prevention Network                                                                |
| Tina                              | Tong             |                       | DrPH(c), MS, RAC(US) |             |                                          |                                                         | COVID-19 Prevention Network                                                                |
| Marina                            | Lee              |                       | PhD                  |             |                                          |                                                         | COVID-19 Prevention Network                                                                |
| James                             | Zhou             |                       | PhD, MS              |             |                                          |                                                         | COVID-19 Prevention Network                                                                |
| Michael                           | Fay              |                       | PhD                  |             |                                          |                                                         | COVID-19 Prevention Network                                                                |
| Kelly                             | McQuarrie        |                       | BSN                  |             |                                          |                                                         | COVID-19 Prevention Network                                                                |
| Chimeremma                        | Nnadi            |                       | MD, PhD              |             |                                          |                                                         | COVID-19 Prevention Network                                                                |
| Obiageli                          | Sogbetun         |                       | MD, MPH              |             |                                          |                                                         | COVID-19 Prevention Network                                                                |

## Supplemental Online Content: Nonauthor Collaborators

\*First name, last name, and suffix (if applicable) are required and will appear in PubMed.

| *First Name and Middle Initial(s) | *Last Name       | *Suffix (eg, Jr, III) | Academic Degrees | Institution | Location (city, state/province, country) | Role or Contribution, eg, chair, principal investigator | Group (if more than 1 Group listed in the byline) and/or Subgroup (eg, Steering Committee) |
|-----------------------------------|------------------|-----------------------|------------------|-------------|------------------------------------------|---------------------------------------------------------|--------------------------------------------------------------------------------------------|
| Nina                              | Ahmad            |                       | MD               |             |                                          |                                                         | COVID-19 Prevention Network                                                                |
| Ian                               | De Proost        |                       | PhD              |             |                                          |                                                         | COVID-19 Prevention Network                                                                |
| Cyrus                             | Hoseyni          |                       | PhD              |             |                                          |                                                         | COVID-19 Prevention Network                                                                |
| Paul                              | Coplan           |                       | ScD, MS, MBA     |             |                                          |                                                         | COVID-19 Prevention Network                                                                |
| Najat                             | Khan             |                       | PhD              |             |                                          |                                                         | COVID-19 Prevention Network                                                                |
| Peter                             | Ronco            |                       | BA               |             |                                          |                                                         | COVID-19 Prevention Network                                                                |
| Dawn                              | Furey            |                       | BA               |             |                                          |                                                         | COVID-19 Prevention Network                                                                |
| Jodi                              | Meck             |                       | MHA              |             |                                          |                                                         | COVID-19 Prevention Network                                                                |
| Johan                             | Vingerhoets      |                       | PhD              |             |                                          |                                                         | COVID-19 Prevention Network                                                                |
| Boerries                          | Brandenburg      |                       | PhD              |             |                                          |                                                         | COVID-19 Prevention Network                                                                |
| Jerome                            | Custers          |                       | PhD              |             |                                          |                                                         | COVID-19 Prevention Network                                                                |
| Jenny                             | Hendriks         |                       | PhD              |             |                                          |                                                         | COVID-19 Prevention Network                                                                |
| Jarek                             | Juraszek         |                       | PhD              |             |                                          |                                                         | COVID-19 Prevention Network                                                                |
| Anne Marit                        | de Groot         |                       | PhD              |             |                                          |                                                         | COVID-19 Prevention Network                                                                |
| Griet                             | Van Roey         |                       | PhD              |             |                                          |                                                         | COVID-19 Prevention Network                                                                |
| Dirk                              | Heerwegh         |                       | PhD              |             |                                          |                                                         | COVID-19 Prevention Network                                                                |
| Ilse                              | Van Dromme       |                       | PhD              |             |                                          |                                                         | COVID-19 Prevention Network                                                                |
| Jorge F.                          | Méndez Galván    |                       | MD               |             |                                          |                                                         | COVID-19 Prevention Network                                                                |
| Monica B.                         | Carrascal        |                       |                  |             |                                          |                                                         | COVID-19 Prevention Network                                                                |
| Adriana                           | Sordo Duran      |                       |                  |             |                                          |                                                         | COVID-19 Prevention Network                                                                |
| Laura Ruy                         | Sanchez Guerrero |                       |                  |             |                                          |                                                         | COVID-19 Prevention Network                                                                |
| Martha Cecilia                    | Gómora Madrid    |                       |                  |             |                                          |                                                         | COVID-19 Prevention Network                                                                |
| Alejandro Quintín                 | Barrat Hernández |                       | MD               |             |                                          |                                                         | COVID-19 Prevention Network                                                                |
| Sharzhaad                         | Molina Guizar    |                       |                  |             |                                          |                                                         | COVID-19 Prevention Network                                                                |
| Denisse Alejandra                 | González Estrada |                       |                  |             |                                          |                                                         | COVID-19 Prevention Network                                                                |
| Silvano Omar                      | Martínez Pérez   |                       | MD               |             |                                          |                                                         | COVID-19 Prevention Network                                                                |
| Zindy Yazmín                      | Zárate Hinojosa  |                       | MD               |             |                                          |                                                         | COVID-19 Prevention Network                                                                |
| Guillermo Miguel                  | Ruiz-Palacios    |                       | MD               |             |                                          |                                                         | COVID-19 Prevention Network                                                                |
| Aurelio                           | Cruz-Valdez      |                       | PhD              |             |                                          |                                                         | COVID-19 Prevention Network                                                                |
| Janeth                            | Pacheco-Flores   |                       | MD               |             |                                          |                                                         | COVID-19 Prevention Network                                                                |
| Anyela                            | Lara             |                       | MD               |             |                                          |                                                         | COVID-19 Prevention Network                                                                |
| Secia                             | Díaz-Miralrio    |                       |                  |             |                                          |                                                         | COVID-19 Prevention Network                                                                |
| María José                        | Reyes Fentanes   |                       | MD               |             |                                          |                                                         | COVID-19 Prevention Network                                                                |
| Jocelyn Zuleica                   | Olmos Vega       |                       | MD               |             |                                          |                                                         | COVID-19 Prevention Network                                                                |
| Daniela                           | Pineda Méndez    |                       | MD               |             |                                          |                                                         | COVID-19 Prevention Network                                                                |
| Karina                            | Cano Martínez    |                       | MD               |             |                                          |                                                         | COVID-19 Prevention Network                                                                |
| Winniberg Stephany                | Alvarez León     |                       |                  |             |                                          |                                                         | COVID-19 Prevention Network                                                                |
| Vida Veronica                     | Ruiz Herrera     |                       | MD               |             |                                          |                                                         | COVID-19 Prevention Network                                                                |
| Eduardo Gabriel                   | Vázquez Saldaña  |                       |                  |             |                                          |                                                         | COVID-19 Prevention Network                                                                |



## Supplemental Online Content: Nonauthor Collaborators

\*First name, last name, and suffix (if applicable) are required and will appear in PubMed.

| *First Name and Middle Initial(s) | *Last Name       | *Suffix (eg, Jr, III) | Academic Degrees | Institution | Location (city, state/province, country) | Role or Contribution, eg, chair, principal investigator | Group (if more than 1 Group listed in the byline) and/or Subgroup (eg, Steering Committee) |
|-----------------------------------|------------------|-----------------------|------------------|-------------|------------------------------------------|---------------------------------------------------------|--------------------------------------------------------------------------------------------|
| Laura Julia                       | Camacho Choza    |                       |                  |             |                                          |                                                         | COVID-19 Prevention Network                                                                |
| Karen Sofia                       | Vega Orozco      |                       |                  |             |                                          |                                                         | COVID-19 Prevention Network                                                                |
| Sandra Janeth                     | Ortega Domínguez |                       |                  |             |                                          |                                                         | COVID-19 Prevention Network                                                                |
| Jorge A.                          | Chacón           |                       | MD               |             |                                          |                                                         | COVID-19 Prevention Network                                                                |
| Juan J.                           | Rivera           |                       | MD               |             |                                          |                                                         | COVID-19 Prevention Network                                                                |
| Erika A.                          | Cutz             |                       | MD               |             |                                          |                                                         | COVID-19 Prevention Network                                                                |
| Maricruz E.                       | Ortegón          |                       | MD               |             |                                          |                                                         | COVID-19 Prevention Network                                                                |
| María I.                          | Rivera           |                       | MD               |             |                                          |                                                         | COVID-19 Prevention Network                                                                |
| David                             | Browder          |                       | MD               |             |                                          |                                                         | COVID-19 Prevention Network                                                                |
| Cortney                           | Burch            |                       |                  |             |                                          |                                                         | COVID-19 Prevention Network                                                                |
| Terri                             | Moye             |                       |                  |             |                                          |                                                         | COVID-19 Prevention Network                                                                |
| Paul                              | Bondy            |                       | MD               |             |                                          |                                                         | COVID-19 Prevention Network                                                                |
| Lesley                            | Browder          |                       | MD               |             |                                          |                                                         | COVID-19 Prevention Network                                                                |
| Rickey D.                         | Manning          |                       | MD               |             |                                          |                                                         | COVID-19 Prevention Network                                                                |
| James W.                          | Hurst            |                       | MD               |             |                                          |                                                         | COVID-19 Prevention Network                                                                |
| Rodney E.                         | Sturgeon         |                       | MD               |             |                                          |                                                         | COVID-19 Prevention Network                                                                |
| Paul H.                           | Wakefield        |                       | MD               |             |                                          |                                                         | COVID-19 Prevention Network                                                                |
| John A.                           | Kirby            |                       | MD               |             |                                          |                                                         | COVID-19 Prevention Network                                                                |
| James                             | Andersen         |                       | MD               |             |                                          |                                                         | COVID-19 Prevention Network                                                                |
| Szheckera                         | Fearon           |                       | MSN, FNP-C       |             |                                          |                                                         | COVID-19 Prevention Network                                                                |
| Rosa                              | Negron           |                       | MD               |             |                                          |                                                         | COVID-19 Prevention Network                                                                |
| Amy                               | Medina           |                       | ADN, BS          |             |                                          |                                                         | COVID-19 Prevention Network                                                                |
| John M.                           | Hill             |                       | MD               |             |                                          |                                                         | COVID-19 Prevention Network                                                                |
| Vivek                             | Rajasekhar       |                       | DO               |             |                                          |                                                         | COVID-19 Prevention Network                                                                |
| Hayes                             | Williams         |                       | MD, PhD          |             |                                          |                                                         | COVID-19 Prevention Network                                                                |
| LaShondra                         | Cade             |                       |                  |             |                                          |                                                         | COVID-19 Prevention Network                                                                |
| Rhodna                            | Fouts            |                       |                  |             |                                          |                                                         | COVID-19 Prevention Network                                                                |
| Connie                            | Moya             |                       |                  |             |                                          |                                                         | COVID-19 Prevention Network                                                                |
| Corey G.                          | Anderson         |                       | MD               |             |                                          |                                                         | COVID-19 Prevention Network                                                                |
| Naomi                             | Devine           |                       | NP-C             |             |                                          |                                                         | COVID-19 Prevention Network                                                                |
| James                             | Ramsey           |                       | NP-C             |             |                                          |                                                         | COVID-19 Prevention Network                                                                |
| Ashley                            | Perez            |                       |                  |             |                                          |                                                         | COVID-19 Prevention Network                                                                |
| David                             | Tatelbaum        |                       |                  |             |                                          |                                                         | COVID-19 Prevention Network                                                                |
| Michael                           | Jacobs           |                       | MD               |             |                                          |                                                         | COVID-19 Prevention Network                                                                |
| Kathleen                          | Menasche         |                       | LPN              |             |                                          |                                                         | COVID-19 Prevention Network                                                                |
| Vincent                           | Mirkil           |                       | MD               |             |                                          |                                                         | COVID-19 Prevention Network                                                                |
| Peter J.                          | Winkle           |                       | MD               |             |                                          |                                                         | COVID-19 Prevention Network                                                                |
| Amina Z.                          | Haggag           |                       | MD               |             |                                          |                                                         | COVID-19 Prevention Network                                                                |
| Michelle                          | Haynes           |                       |                  |             |                                          |                                                         | COVID-19 Prevention Network                                                                |

## Supplemental Online Content: Nonauthor Collaborators

\*First name, last name, and suffix (if applicable) are required and will appear in PubMed.

| *First Name and Middle Initial(s) | *Last Name  | *Suffix (eg, Jr, III) | Academic Degrees  | Institution | Location (city, state/province, country) | Role or Contribution, eg, chair, principal investigator | Group (if more than 1 Group listed in the byline) and/or Subgroup (eg, Steering Committee) |
|-----------------------------------|-------------|-----------------------|-------------------|-------------|------------------------------------------|---------------------------------------------------------|--------------------------------------------------------------------------------------------|
| Marysol                           | Villegas    |                       |                   |             |                                          |                                                         | COVID-19 Prevention Network                                                                |
| Sabina                            | Raja        |                       |                   |             |                                          |                                                         | COVID-19 Prevention Network                                                                |
| Robert                            | Riesenberg  |                       | MD                |             |                                          |                                                         | COVID-19 Prevention Network                                                                |
| Stanford                          | Plavin      |                       | MD                |             |                                          |                                                         | COVID-19 Prevention Network                                                                |
| Mark                              | Lerman      |                       | MD                |             |                                          |                                                         | COVID-19 Prevention Network                                                                |
| Leana                             | Woodside    |                       | DNP, NP-C         |             |                                          |                                                         | COVID-19 Prevention Network                                                                |
| Maria                             | Johnson     |                       | MD                |             |                                          |                                                         | COVID-19 Prevention Network                                                                |
| C. Mary                           | Healy       |                       | MD                |             |                                          |                                                         | COVID-19 Prevention Network                                                                |
| Jennifer A.                       | Whitaker    |                       | MD                |             |                                          |                                                         | COVID-19 Prevention Network                                                                |
| Wendy A.                          | Keitel      |                       | MD                |             |                                          |                                                         | COVID-19 Prevention Network                                                                |
| Robert L.                         | Atmar       |                       | MD                |             |                                          |                                                         | COVID-19 Prevention Network                                                                |
| Gary                              | Horwith     |                       | MD                |             |                                          |                                                         | COVID-19 Prevention Network                                                                |
| Robin                             | Mason       |                       | MS, MBA           |             |                                          |                                                         | COVID-19 Prevention Network                                                                |
| Lisa                              | Johnson     |                       | FNP               |             |                                          |                                                         | COVID-19 Prevention Network                                                                |
| Tambra                            | Dora        |                       |                   |             |                                          |                                                         | COVID-19 Prevention Network                                                                |
| Deborah                           | Murray      |                       | FNP               |             |                                          |                                                         | COVID-19 Prevention Network                                                                |
| Michael                           | Cancilla    |                       | PA                |             |                                          |                                                         | COVID-19 Prevention Network                                                                |
| Logan                             | Ledbetter   |                       | PA                |             |                                          |                                                         | COVID-19 Prevention Network                                                                |
| Beverly                           | Ewing       |                       | APRN, DNP, FNP-BC |             |                                          |                                                         | COVID-19 Prevention Network                                                                |
| Kathryn E.                        | Stephenson  |                       | MD, MPH           |             |                                          |                                                         | COVID-19 Prevention Network                                                                |
| Chen S.                           | Tan         |                       | MD                |             |                                          |                                                         | COVID-19 Prevention Network                                                                |
| Rebecca                           | Zash        |                       | MD                |             |                                          |                                                         | COVID-19 Prevention Network                                                                |
| Jessica L.                        | Ansel       |                       | MSN               |             |                                          |                                                         | COVID-19 Prevention Network                                                                |
| Kate                              | Jaegle      |                       | MSN               |             |                                          |                                                         | COVID-19 Prevention Network                                                                |
| Caitlin J.                        | Guiney      |                       | MSN               |             |                                          |                                                         | COVID-19 Prevention Network                                                                |
| Jeffrey A.                        | Henderson   |                       | MD, MPH           |             |                                          |                                                         | COVID-19 Prevention Network                                                                |
| Marcia                            | O'Leary     |                       | RN                |             |                                          |                                                         | COVID-19 Prevention Network                                                                |
| Kendra                            | Enright     |                       | RN                |             |                                          |                                                         | COVID-19 Prevention Network                                                                |
| Jill                              | Kessler     |                       | MS                |             |                                          |                                                         | COVID-19 Prevention Network                                                                |
| Pete                              | Ducheneaux  |                       | LPN               |             |                                          |                                                         | COVID-19 Prevention Network                                                                |
| Asha                              | Inniss      |                       | MS, APRN          |             |                                          |                                                         | COVID-19 Prevention Network                                                                |
| Donald M.                         | Brandon     |                       | MD                |             |                                          |                                                         | COVID-19 Prevention Network                                                                |
| William B.                        | Davis       |                       | MD                |             |                                          |                                                         | COVID-19 Prevention Network                                                                |
| Daniel T.                         | Lawler      |                       | MD                |             |                                          |                                                         | COVID-19 Prevention Network                                                                |
| Yaa D.                            | Oppong      |                       | MD                |             |                                          |                                                         | COVID-19 Prevention Network                                                                |
| Ryan P.                           | Starr       |                       | DO                |             |                                          |                                                         | COVID-19 Prevention Network                                                                |
| Scott N.                          | Syndergaard |                       | DO                |             |                                          |                                                         | COVID-19 Prevention Network                                                                |

## Supplemental Online Content: Nonauthor Collaborators

\*First name, last name, and suffix (if applicable) are required and will appear in PubMed.

| *First Name and Middle Initial(s) | *Last Name     | *Suffix (eg, Jr, III) | Academic Degrees    | Institution | Location (city, state/province, country) | Role or Contribution, eg, chair, principal investigator | Group (if more than 1 Group listed in the byline) and/or Subgroup (eg, Steering Committee) |
|-----------------------------------|----------------|-----------------------|---------------------|-------------|------------------------------------------|---------------------------------------------------------|--------------------------------------------------------------------------------------------|
| Rozeli                            | Shelly         |                       | MD                  |             |                                          |                                                         | COVID-19 Prevention Network                                                                |
| Mashrur                           | Islam Majumder |                       |                     |             |                                          |                                                         | COVID-19 Prevention Network                                                                |
| Danny                             | Sugimoto       |                       | MD                  |             |                                          |                                                         | COVID-19 Prevention Network                                                                |
| Jeffrey                           | Dugas          | Sr.                   | MD                  |             |                                          |                                                         | COVID-19 Prevention Network                                                                |
| Dolores                           | Rijos          |                       |                     |             |                                          |                                                         | COVID-19 Prevention Network                                                                |
| Sandra                            | Shelton        |                       |                     |             |                                          |                                                         | COVID-19 Prevention Network                                                                |
| Stephan                           | Hong           |                       | MD                  |             |                                          |                                                         | COVID-19 Prevention Network                                                                |
| Howard                            | Schwartz       |                       | MD                  |             |                                          |                                                         | COVID-19 Prevention Network                                                                |
| Nelia                             | Sanchez-Crespo |                       | MD                  |             |                                          |                                                         | COVID-19 Prevention Network                                                                |
| Jennifer                          | Schwartz       |                       | APRN                |             |                                          |                                                         | COVID-19 Prevention Network                                                                |
| Terry                             | Piedra         |                       | BS                  |             |                                          |                                                         | COVID-19 Prevention Network                                                                |
| Barbara                           | Corral         |                       | APRN                |             |                                          |                                                         | COVID-19 Prevention Network                                                                |
| Carmen                            | Medina         |                       | PA                  |             |                                          |                                                         | COVID-19 Prevention Network                                                                |
| Michael E.                        | Dever          |                       | MD                  |             |                                          |                                                         | COVID-19 Prevention Network                                                                |
| Mitul                             | Shah           |                       | MD                  |             |                                          |                                                         | COVID-19 Prevention Network                                                                |
| Michael                           | Delgado        |                       | MD                  |             |                                          |                                                         | COVID-19 Prevention Network                                                                |
| Tameika                           | Scott          |                       | DrPH                |             |                                          |                                                         | COVID-19 Prevention Network                                                                |
| Lisa S.                           | Usdan          |                       | MD                  |             |                                          |                                                         | COVID-19 Prevention Network                                                                |
| Lora J.                           | McGill         |                       | MD                  |             |                                          |                                                         | COVID-19 Prevention Network                                                                |
| Valerie K.                        | Arnold         |                       | MD                  |             |                                          |                                                         | COVID-19 Prevention Network                                                                |
| Carolyn                           | Scatamacchia   |                       | MSN, NP-C           |             |                                          |                                                         | COVID-19 Prevention Network                                                                |
| Codi M.                           | Anthony        |                       | DNP, APRN, PMHNP-BC |             |                                          |                                                         | COVID-19 Prevention Network                                                                |
| Rajan                             | Merchant       |                       | MD                  |             |                                          |                                                         | COVID-19 Prevention Network                                                                |
| Anelgine C.                       | Yoon           |                       | MD                  |             |                                          |                                                         | COVID-19 Prevention Network                                                                |
| Janet                             | Hill           |                       | PA-C                |             |                                          |                                                         | COVID-19 Prevention Network                                                                |
| Lucy                              | Ng-Price       |                       | MA                  |             |                                          |                                                         | COVID-19 Prevention Network                                                                |
| Teri                              | Thompson-Seim  |                       |                     |             |                                          |                                                         | COVID-19 Prevention Network                                                                |
| Ronald                            | Ackerman       |                       | MD                  |             |                                          |                                                         | COVID-19 Prevention Network                                                                |
| Jamie                             | Ackerman       |                       |                     |             |                                          |                                                         | COVID-19 Prevention Network                                                                |
| Florida                           | Aristy         |                       | APRN                |             |                                          |                                                         | COVID-19 Prevention Network                                                                |
| Nzeera                            | Ketter         |                       |                     |             |                                          |                                                         | COVID-19 Prevention Network                                                                |
| Jon                               | Finley         |                       | MD                  |             |                                          |                                                         | COVID-19 Prevention Network                                                                |
| Mildred                           | Stull          |                       | APRN, FNP-C         |             |                                          |                                                         | COVID-19 Prevention Network                                                                |
| Monica                            | Murray         |                       |                     |             |                                          |                                                         | COVID-19 Prevention Network                                                                |
| Zainab                            | Rizvi          |                       |                     |             |                                          |                                                         | COVID-19 Prevention Network                                                                |

## Supplemental Online Content: Nonauthor Collaborators

\*First name, last name, and suffix (if applicable) are required and will appear in PubMed.

| *First Name and Middle Initial(s) | *Last Name      | *Suffix (eg, Jr, III) | Academic Degrees | Institution | Location (city, state/province, country) | Role or Contribution, eg, chair, principal investigator | Group (if more than 1 Group listed in the byline) and/or Subgroup (eg, Steering Committee) |
|-----------------------------------|-----------------|-----------------------|------------------|-------------|------------------------------------------|---------------------------------------------------------|--------------------------------------------------------------------------------------------|
| Sonia                             | Guerrero        |                       |                  |             |                                          |                                                         | COVID-19 Prevention Network                                                                |
| Yogesh K.                         | Paliwal         |                       | MD               |             |                                          |                                                         | COVID-19 Prevention Network                                                                |
| Amit                              | Paliwal         |                       | MD               |             |                                          |                                                         | COVID-19 Prevention Network                                                                |
| Sarah                             | Gordon          |                       | MS               |             |                                          |                                                         | COVID-19 Prevention Network                                                                |
| Bryan                             | Gordon          |                       |                  |             |                                          |                                                         | COVID-19 Prevention Network                                                                |
| Cynthia                           | Montano-Pereira |                       |                  |             |                                          |                                                         | COVID-19 Prevention Network                                                                |
| Christopher                       | Galloway        |                       | MD               |             |                                          |                                                         | COVID-19 Prevention Network                                                                |
| Candice                           | Montros         |                       |                  |             |                                          |                                                         | COVID-19 Prevention Network                                                                |
| Lily                              | Aleman          |                       |                  |             |                                          |                                                         | COVID-19 Prevention Network                                                                |
| Samira                            | Shairi          |                       | RN               |             |                                          |                                                         | COVID-19 Prevention Network                                                                |
| Wesley                            | Van Ever        |                       |                  |             |                                          |                                                         | COVID-19 Prevention Network                                                                |
| George H.                         | Freeman         |                       | MD               |             |                                          |                                                         | COVID-19 Prevention Network                                                                |
| Esther L.                         | Harmon          |                       | ANP              |             |                                          |                                                         | COVID-19 Prevention Network                                                                |
| Marshall A.                       | Cross           |                       | MD               |             |                                          |                                                         | COVID-19 Prevention Network                                                                |
| Kacie                             | Sales           |                       | BSN, RN          |             |                                          |                                                         | COVID-19 Prevention Network                                                                |
| Catherine Q.                      | Gular           |                       | PharmD           |             |                                          |                                                         | COVID-19 Prevention Network                                                                |
| Matthew                           | Hepburn         |                       | MD               |             |                                          |                                                         | COVID-19 Prevention Network                                                                |
| Nathan                            | Alderson        |                       | PhD              |             |                                          |                                                         | COVID-19 Prevention Network                                                                |
| Shana                             | Harshell        |                       |                  |             |                                          |                                                         | COVID-19 Prevention Network                                                                |
| Siham                             | Mahgoub         |                       | MD               |             |                                          |                                                         | COVID-19 Prevention Network                                                                |
| Celia                             | Maxwell         |                       | MD               |             |                                          |                                                         | COVID-19 Prevention Network                                                                |
| Thomas                            | Mellman         |                       | MD               |             |                                          |                                                         | COVID-19 Prevention Network                                                                |
| Karl M.                           | Thompson        |                       | PhD              |             |                                          |                                                         | COVID-19 Prevention Network                                                                |
| Glenn                             | Wortman         |                       | MD               |             |                                          |                                                         | COVID-19 Prevention Network                                                                |
| Jeff                              | Kingsley        |                       | DO               |             |                                          |                                                         | COVID-19 Prevention Network                                                                |
| April                             | Pixler          |                       |                  |             |                                          |                                                         | COVID-19 Prevention Network                                                                |
| LaKondria                         | Curry           |                       |                  |             |                                          |                                                         | COVID-19 Prevention Network                                                                |
| Sarah                             | Afework         |                       |                  |             |                                          |                                                         | COVID-19 Prevention Network                                                                |
| Austin                            | Swanson         |                       |                  |             |                                          |                                                         | COVID-19 Prevention Network                                                                |
| Jeffry                            | Jacqmein        |                       | MD               |             |                                          |                                                         | COVID-19 Prevention Network                                                                |
| Maggie                            | Bowers          |                       | PA-C             |             |                                          |                                                         | COVID-19 Prevention Network                                                                |
| Dawn                              | Robison         |                       | APRN-C           |             |                                          |                                                         | COVID-19 Prevention Network                                                                |
| Victoria                          | Mosteller       |                       | MD               |             |                                          |                                                         | COVID-19 Prevention Network                                                                |
| Janet                             | Garvey          |                       | DNP              |             |                                          |                                                         | COVID-19 Prevention Network                                                                |
| Mary                              | Easley          |                       | BSN, RN          |             |                                          |                                                         | COVID-19 Prevention Network                                                                |
| Rebecca J.                        | Kurnat          |                       |                  |             |                                          |                                                         | COVID-19 Prevention Network                                                                |
| Raymond                           | Cornelison      |                       | MD               |             |                                          |                                                         | COVID-19 Prevention Network                                                                |
| Shanda                            | Gower           |                       | APRN, CNP        |             |                                          |                                                         | COVID-19 Prevention Network                                                                |
| William                           | Schnitz         |                       | MD               |             |                                          |                                                         | COVID-19 Prevention Network                                                                |

## Supplemental Online Content: Nonauthor Collaborators

\*First name, last name, and suffix (if applicable) are required and will appear in PubMed.

| *First Name and Middle Initial(s) | *Last Name         | *Suffix (eg, Jr, III) | Academic Degrees | Institution | Location (city, state/province, country) | Role or Contribution, eg, chair, principal investigator | Group (if more than 1 Group listed in the byline) and/or Subgroup (eg, Steering Committee) |
|-----------------------------------|--------------------|-----------------------|------------------|-------------|------------------------------------------|---------------------------------------------------------|--------------------------------------------------------------------------------------------|
| Destiny S.                        | Heinzig-Cartwright |                       | BA               |             |                                          |                                                         | COVID-19 Prevention Network                                                                |
| Derek                             | Lewis              |                       | MD               |             |                                          |                                                         | COVID-19 Prevention Network                                                                |
| Fred E.                           | Newton             |                       | MD               |             |                                          |                                                         | COVID-19 Prevention Network                                                                |
| Aeirress                          | Duhart             |                       |                  |             |                                          |                                                         | COVID-19 Prevention Network                                                                |
| Breanz                            | Watkins            |                       |                  |             |                                          |                                                         | COVID-19 Prevention Network                                                                |
| Brandy                            | Ball               |                       |                  |             |                                          |                                                         | COVID-19 Prevention Network                                                                |
| Jill                              | York               |                       |                  |             |                                          |                                                         | COVID-19 Prevention Network                                                                |
| Shelby                            | Pickle             |                       |                  |             |                                          |                                                         | COVID-19 Prevention Network                                                                |
| David B.                          | Musante            |                       | MD               |             |                                          |                                                         | COVID-19 Prevention Network                                                                |
| William P.                        | Silver             |                       | MD               |             |                                          |                                                         | COVID-19 Prevention Network                                                                |
| Linda R.                          | Belhorn            |                       | MD               |             |                                          |                                                         | COVID-19 Prevention Network                                                                |
| Nicholas A.                       | Viens              |                       | MD               |             |                                          |                                                         | COVID-19 Prevention Network                                                                |
| David                             | Dellaero           |                       | MD               |             |                                          |                                                         | COVID-19 Prevention Network                                                                |
| Matthew                           | Hong               |                       | MD               |             |                                          |                                                         | COVID-19 Prevention Network                                                                |
| Priti                             | Patel              |                       | NP               |             |                                          |                                                         | COVID-19 Prevention Network                                                                |
| Kendra                            | Lisec              |                       | PA               |             |                                          |                                                         | COVID-19 Prevention Network                                                                |
| Beth                              | Safirstein         |                       | MD               |             |                                          |                                                         | COVID-19 Prevention Network                                                                |
| Luz                               | Zapata             |                       | MD               |             |                                          |                                                         | COVID-19 Prevention Network                                                                |
| Lazaro                            | Gonzalez           |                       | APRN             |             |                                          |                                                         | COVID-19 Prevention Network                                                                |
| Evelyn                            | Quevedo            |                       | APRN             |             |                                          |                                                         | COVID-19 Prevention Network                                                                |
| Farah                             | Irani              |                       | PhD              |             |                                          |                                                         | COVID-19 Prevention Network                                                                |
| Joseph                            | Grillo             |                       | MD               |             |                                          |                                                         | COVID-19 Prevention Network                                                                |
| Amy                               | Potts              |                       | PA-C,<br>MPH     |             |                                          |                                                         | COVID-19 Prevention Network                                                                |
| Julie                             | White              |                       | MBA              |             |                                          |                                                         | COVID-19 Prevention Network                                                                |
| Patrick                           | Flume              |                       | MD               |             |                                          |                                                         | COVID-19 Prevention Network                                                                |
| Gary                              | Headden            |                       | MD               |             |                                          |                                                         | COVID-19 Prevention Network                                                                |
| Brandie                           | Taylor             |                       | NP               |             |                                          |                                                         | COVID-19 Prevention Network                                                                |
| Ashley                            | Warden             |                       |                  |             |                                          |                                                         | COVID-19 Prevention Network                                                                |
| Amy                               | Chamberlain        |                       |                  |             |                                          |                                                         | COVID-19 Prevention Network                                                                |
| Robert                            | Jeanfreau          |                       | MD               |             |                                          |                                                         | COVID-19 Prevention Network                                                                |
| Susan                             | Jeanfreau          |                       | MD               |             |                                          |                                                         | COVID-19 Prevention Network                                                                |
| Paul G.                           | Matherne           |                       | MD               |             |                                          |                                                         | COVID-19 Prevention Network                                                                |
| Amy                               | Caldwell           |                       | RN               |             |                                          |                                                         | COVID-19 Prevention Network                                                                |
| Jessica                           | Stahl              |                       |                  |             |                                          |                                                         | COVID-19 Prevention Network                                                                |
| Mandy                             | Vowell             |                       |                  |             |                                          |                                                         | COVID-19 Prevention Network                                                                |
| Lauren                            | Newhouse           |                       |                  |             |                                          |                                                         | COVID-19 Prevention Network                                                                |
| Vladimir                          | Berthaud           |                       | MD, MPH          |             |                                          |                                                         | COVID-19 Prevention Network                                                                |
| Zudi-Mwak                         | Takizala           |                       | MD, MPH,<br>MBA  |             |                                          |                                                         | COVID-19 Prevention Network                                                                |

## Supplemental Online Content: Nonauthor Collaborators

\*First name, last name, and suffix (if applicable) are required and will appear in PubMed.

| *First Name and Middle Initial(s) | *Last Name    | *Suffix (eg, Jr, III) | Academic Degrees | Institution | Location (city, state/province, country) | Role or Contribution, eg, chair, principal investigator | Group (if more than 1 Group listed in the byline) and/or Subgroup (eg, Steering Committee) |
|-----------------------------------|---------------|-----------------------|------------------|-------------|------------------------------------------|---------------------------------------------------------|--------------------------------------------------------------------------------------------|
| Genevieve                         | Beninati      |                       | FNP              |             |                                          |                                                         | COVID-19 Prevention Network                                                                |
| Kimberly                          | Snell         |                       | PharmD           |             |                                          |                                                         | COVID-19 Prevention Network                                                                |
| Sherrie                           | Baker         |                       | BS               |             |                                          |                                                         | COVID-19 Prevention Network                                                                |
| James                             | Walker        |                       | RN               |             |                                          |                                                         | COVID-19 Prevention Network                                                                |
| Tavane                            | Harrison      |                       | CNP              |             |                                          |                                                         | COVID-19 Prevention Network                                                                |
| Meagan                            | Miller        |                       |                  |             |                                          |                                                         | COVID-19 Prevention Network                                                                |
| Janet                             | Otto          |                       |                  |             |                                          |                                                         | COVID-19 Prevention Network                                                                |
| Roni                              | Gray          |                       | APRN             |             |                                          |                                                         | COVID-19 Prevention Network                                                                |
| Christine                         | Wilson        |                       |                  |             |                                          |                                                         | COVID-19 Prevention Network                                                                |
| Tiffany                           | Nemecek       |                       |                  |             |                                          |                                                         | COVID-19 Prevention Network                                                                |
| Hannah                            | Harrington    |                       | MPH              |             |                                          |                                                         | COVID-19 Prevention Network                                                                |
| Chelsie                           | Nutsch        |                       | NP               |             |                                          |                                                         | COVID-19 Prevention Network                                                                |
| Sally                             | Eppenbach     |                       | NP               |             |                                          |                                                         | COVID-19 Prevention Network                                                                |
| Wendell                           | Lewis         |                       | NP               |             |                                          |                                                         | COVID-19 Prevention Network                                                                |
| Tana                              | Bourgeois     |                       | RN               |             |                                          |                                                         | COVID-19 Prevention Network                                                                |
| Lyndsea                           | Folsom        |                       |                  |             |                                          |                                                         | COVID-19 Prevention Network                                                                |
| Gregory                           | Holt          |                       | MD               |             |                                          |                                                         | COVID-19 Prevention Network                                                                |
| Mehdi                             | Mirsaeidi     |                       | MD               |             |                                          |                                                         | COVID-19 Prevention Network                                                                |
| Rafael                            | Calderon      |                       | MD               |             |                                          |                                                         | COVID-19 Prevention Network                                                                |
| Paola                             | Lichtenberger |                       | MD               |             |                                          |                                                         | COVID-19 Prevention Network                                                                |
| Jalima                            | Quintero      |                       | RN               |             |                                          |                                                         | COVID-19 Prevention Network                                                                |
| Becky                             | Martinez      |                       | RN               |             |                                          |                                                         | COVID-19 Prevention Network                                                                |
| Lilly                             | Immergluck    |                       | MD               |             |                                          |                                                         | COVID-19 Prevention Network                                                                |
| Erica                             | Johnson       |                       | PhD              |             |                                          |                                                         | COVID-19 Prevention Network                                                                |
| Austin                            | Chan          |                       | MD               |             |                                          |                                                         | COVID-19 Prevention Network                                                                |
| Norberto                          | Fas           |                       | MD               |             |                                          |                                                         | COVID-19 Prevention Network                                                                |
| LaTeshia                          | Thomas-Seaton |                       | MS, APRN         |             |                                          |                                                         | COVID-19 Prevention Network                                                                |
| Saadia                            | Khizer        |                       | MD, MPH          |             |                                          |                                                         | COVID-19 Prevention Network                                                                |
| Jonathan                          | Staben        |                       | MD               |             |                                          |                                                         | COVID-19 Prevention Network                                                                |
| Tatiana                           | Beresnev      |                       | MD               |             |                                          |                                                         | COVID-19 Prevention Network                                                                |
| Maryam                            | Jahromi       |                       | MD               |             |                                          |                                                         | COVID-19 Prevention Network                                                                |
| Mary A.                           | Marovich      |                       | MD               |             |                                          |                                                         | COVID-19 Prevention Network                                                                |
| Julia                             | Hutter        |                       | MD               |             |                                          |                                                         | COVID-19 Prevention Network                                                                |
| Martha                            | Nason         |                       | PhD              |             |                                          |                                                         | COVID-19 Prevention Network                                                                |
| Julie                             | Ledgerwood    |                       | DO               |             |                                          |                                                         | COVID-19 Prevention Network                                                                |
| John                              | Mascola       |                       | MD               |             |                                          |                                                         | COVID-19 Prevention Network                                                                |
| Mark                              | Leibowitz     |                       | MD               |             |                                          |                                                         | COVID-19 Prevention Network                                                                |
| Fernanda                          | Morales       |                       |                  |             |                                          |                                                         | COVID-19 Prevention Network                                                                |
| Mike                              | Delgado       |                       |                  |             |                                          |                                                         | COVID-19 Prevention Network                                                                |
| Rosario                           | Sanchez       |                       |                  |             |                                          |                                                         | COVID-19 Prevention Network                                                                |

## Supplemental Online Content: Nonauthor Collaborators

\*First name, last name, and suffix (if applicable) are required and will appear in PubMed.

| *First Name and Middle Initial(s) | *Last Name      | *Suffix (eg, Jr, III) | Academic Degrees | Institution | Location (city, state/province, country) | Role or Contribution, eg, chair, principal investigator | Group (if more than 1 Group listed in the byline) and/or Subgroup (eg, Steering Committee) |
|-----------------------------------|-----------------|-----------------------|------------------|-------------|------------------------------------------|---------------------------------------------------------|--------------------------------------------------------------------------------------------|
| Norma                             | Vega            |                       |                  |             |                                          |                                                         | COVID-19 Prevention Network                                                                |
| Germán                            | Áñez            |                       | MD               |             |                                          |                                                         | COVID-19 Prevention Network                                                                |
| Gary                              | Albert          |                       |                  |             |                                          |                                                         | COVID-19 Prevention Network                                                                |
| Erin                              | Coston          |                       |                  |             |                                          |                                                         | COVID-19 Prevention Network                                                                |
| Chinar                            | Desai           |                       |                  |             |                                          |                                                         | COVID-19 Prevention Network                                                                |
| Haoua                             | Dunbar          |                       |                  |             |                                          |                                                         | COVID-19 Prevention Network                                                                |
| Mark                              | Eickhoff        |                       |                  |             |                                          |                                                         | COVID-19 Prevention Network                                                                |
| Jenina                            | Garcia          |                       |                  |             |                                          |                                                         | COVID-19 Prevention Network                                                                |
| Margaret                          | Kautz           |                       |                  |             |                                          |                                                         | COVID-19 Prevention Network                                                                |
| Angela                            | Lee             |                       |                  |             |                                          |                                                         | COVID-19 Prevention Network                                                                |
| Maggie                            | Lewis           |                       |                  |             |                                          |                                                         | COVID-19 Prevention Network                                                                |
| Alice                             | McGarry         |                       |                  |             |                                          |                                                         | COVID-19 Prevention Network                                                                |
| Irene                             | McKnight        |                       |                  |             |                                          |                                                         | COVID-19 Prevention Network                                                                |
| Joy                               | Nelson          |                       |                  |             |                                          |                                                         | COVID-19 Prevention Network                                                                |
| Patrick                           | Newingham       |                       |                  |             |                                          |                                                         | COVID-19 Prevention Network                                                                |
| Patty                             | Price-Abbott    |                       |                  |             |                                          |                                                         | COVID-19 Prevention Network                                                                |
| Patty                             | Reed            |                       |                  |             |                                          |                                                         | COVID-19 Prevention Network                                                                |
| Diana                             | Vegas           |                       |                  |             |                                          |                                                         | COVID-19 Prevention Network                                                                |
| Bethanie                          | Wilkinson       |                       | PhD              |             |                                          |                                                         | COVID-19 Prevention Network                                                                |
| Katherine                         | Smith           |                       | MD               |             |                                          |                                                         | COVID-19 Prevention Network                                                                |
| Wayne                             | Woo             |                       | MS               |             |                                          |                                                         | COVID-19 Prevention Network                                                                |
| Iksung                            | Cho             |                       | MS               |             |                                          |                                                         | COVID-19 Prevention Network                                                                |
| Gregory M.                        | Glenn           |                       | MD               |             |                                          |                                                         | COVID-19 Prevention Network                                                                |
| Filip                             | Dubovsky        |                       | MD, MPH          |             |                                          |                                                         | COVID-19 Prevention Network                                                                |
| David L.                          | Fried           |                       | MD               |             |                                          |                                                         | COVID-19 Prevention Network                                                                |
| Lynne A.                          | Haughey         |                       | MSN, FNP         |             |                                          |                                                         | COVID-19 Prevention Network                                                                |
| Ariana C.                         | Stanton         |                       | PA-C             |             |                                          |                                                         | COVID-19 Prevention Network                                                                |
| Lisa                              | Stevens Rameaka |                       | MD               |             |                                          |                                                         | COVID-19 Prevention Network                                                                |
| David                             | Rosenberg       |                       | MD               |             |                                          |                                                         | COVID-19 Prevention Network                                                                |
| Lee                               | Tomatsu         |                       |                  |             |                                          |                                                         | COVID-19 Prevention Network                                                                |
| Viviana                           | Gonzalez        |                       |                  |             |                                          |                                                         | COVID-19 Prevention Network                                                                |
| Millie                            | Manalo          |                       |                  |             |                                          |                                                         | COVID-19 Prevention Network                                                                |
| Bernard                           | Grunstra        |                       | MD               |             |                                          |                                                         | COVID-19 Prevention Network                                                                |
| Donald                            | Quinn           |                       | MD               |             |                                          |                                                         | COVID-19 Prevention Network                                                                |
| Phillip                           | Claybrook       |                       | MD               |             |                                          |                                                         | COVID-19 Prevention Network                                                                |
| Shelby                            | Olds            |                       | MD               |             |                                          |                                                         | COVID-19 Prevention Network                                                                |
| Amy                               | Dye             |                       |                  |             |                                          |                                                         | COVID-19 Prevention Network                                                                |
| Kevin D.                          | Cannon          |                       | MD               |             |                                          |                                                         | COVID-19 Prevention Network                                                                |
| Mesha M.                          | Chadwick        |                       | MD               |             |                                          |                                                         | COVID-19 Prevention Network                                                                |
| Bailey                            | Jordan          |                       |                  |             |                                          |                                                         | COVID-19 Prevention Network                                                                |

## Supplemental Online Content: Nonauthor Collaborators

\*First name, last name, and suffix (if applicable) are required and will appear in PubMed.

| *First Name and Middle Initial(s) | *Last Name       | *Suffix (eg, Jr, III) | Academic Degrees | Institution | Location (city, state/province, country) | Role or Contribution, eg, chair, principal investigator | Group (if more than 1 Group listed in the byline) and/or Subgroup (eg, Steering Committee) |
|-----------------------------------|------------------|-----------------------|------------------|-------------|------------------------------------------|---------------------------------------------------------|--------------------------------------------------------------------------------------------|
| Morgan                            | Hussey           |                       |                  |             |                                          |                                                         | COVID-19 Prevention Network                                                                |
| Hannah                            | Nevarez          |                       |                  |             |                                          |                                                         | COVID-19 Prevention Network                                                                |
| Colleen F.                        | Kelley           |                       | MD, MPH          |             |                                          |                                                         | COVID-19 Prevention Network                                                                |
| Michael                           | Chung            |                       | MD               |             |                                          |                                                         | COVID-19 Prevention Network                                                                |
| Caitlin                           | Moran            |                       | MD, MSc          |             |                                          |                                                         | COVID-19 Prevention Network                                                                |
| Paulina                           | Rebolledo        |                       | MD               |             |                                          |                                                         | COVID-19 Prevention Network                                                                |
| Christina                         | Bacher           |                       | PAC              |             |                                          |                                                         | COVID-19 Prevention Network                                                                |
| Elizabeth                         | Barranco-Santana |                       | MD               |             |                                          |                                                         | COVID-19 Prevention Network                                                                |
| Jessica                           | Rodriguez        |                       | MD               |             |                                          |                                                         | COVID-19 Prevention Network                                                                |
| Rafael                            | Mendoza          |                       | MD               |             |                                          |                                                         | COVID-19 Prevention Network                                                                |
| Karen                             | Ruperto          |                       | MD               |             |                                          |                                                         | COVID-19 Prevention Network                                                                |
| Odette                            | Olivieri         |                       | MD               |             |                                          |                                                         | COVID-19 Prevention Network                                                                |
| Enrique                           | Ocaña            |                       | MD               |             |                                          |                                                         | COVID-19 Prevention Network                                                                |
| Paul E.                           | Wylie            |                       | MD               |             |                                          |                                                         | COVID-19 Prevention Network                                                                |
| Renea                             | Henderson        |                       | DO               |             |                                          |                                                         | COVID-19 Prevention Network                                                                |
| Natasa                            | Jenson           |                       | MD               |             |                                          |                                                         | COVID-19 Prevention Network                                                                |
| Fan                               | Yang             |                       | MD               |             |                                          |                                                         | COVID-19 Prevention Network                                                                |
| Amy                               | Kelley           |                       | BSN, RN          |             |                                          |                                                         | COVID-19 Prevention Network                                                                |
| Kenneth                           | Finkelstein      |                       | DO               |             |                                          |                                                         | COVID-19 Prevention Network                                                                |
| David                             | Beckmann         |                       | MD               |             |                                          |                                                         | COVID-19 Prevention Network                                                                |
| Tanya                             | Hutchins         |                       | FNP              |             |                                          |                                                         | COVID-19 Prevention Network                                                                |
| Sebastian                         | Garcia Escallon  |                       | BA               |             |                                          |                                                         | COVID-19 Prevention Network                                                                |
| Kristen                           | Johnson          |                       |                  |             |                                          |                                                         | COVID-19 Prevention Network                                                                |
| Teresa S.                         | Sligh            |                       | MD               |             |                                          |                                                         | COVID-19 Prevention Network                                                                |
| Parul                             | Desai            |                       | NP               |             |                                          |                                                         | COVID-19 Prevention Network                                                                |
| Vincent                           | Huynh            |                       | BSc              |             |                                          |                                                         | COVID-19 Prevention Network                                                                |
| Carlos                            | Lopez            |                       | MD               |             |                                          |                                                         | COVID-19 Prevention Network                                                                |
| Erika                             | Mendoza          |                       | BA               |             |                                          |                                                         | COVID-19 Prevention Network                                                                |
| Jeffrey                           | Adelglass        |                       | MD               |             |                                          |                                                         | COVID-19 Prevention Network                                                                |
| Jerome G.                         | Naifeh           |                       | MD               |             |                                          |                                                         | COVID-19 Prevention Network                                                                |
| Kristine J.                       | Kucera           |                       | PA-C, MPAS, DHS  |             |                                          |                                                         | COVID-19 Prevention Network                                                                |
| Waseem                            | Chughtai         |                       | BS, MBBS         |             |                                          |                                                         | COVID-19 Prevention Network                                                                |
| Shireen H.                        | Jaffer           |                       |                  |             |                                          |                                                         | COVID-19 Prevention Network                                                                |
| Matthew G.                        | Davis            |                       | MD               |             |                                          |                                                         | COVID-19 Prevention Network                                                                |
| Jennifer                          | Foley            |                       |                  |             |                                          |                                                         | COVID-19 Prevention Network                                                                |
| Michelle L.                       | Burgett          |                       | RN               |             |                                          |                                                         | COVID-19 Prevention Network                                                                |
| Tammi L.                          | Shlotzhauer      |                       | MD               |             |                                          |                                                         | COVID-19 Prevention Network                                                                |
| Sarah M.                          | Ingalsbe-Geno    |                       | RPA-C            |             |                                          |                                                         | COVID-19 Prevention Network                                                                |



## Supplemental Online Content: Nonauthor Collaborators

\*First name, last name, and suffix (if applicable) are required and will appear in PubMed.

| *First Name and Middle Initial(s) | *Last Name | *Suffix (eg, Jr, III) | Academic Degrees | Institution | Location (city, state/province, country) | Role or Contribution, eg, chair, principal investigator | Group (if more than 1 Group listed in the byline) and/or Subgroup (eg, Steering Committee) |
|-----------------------------------|------------|-----------------------|------------------|-------------|------------------------------------------|---------------------------------------------------------|--------------------------------------------------------------------------------------------|
| Daniel                            | Duncanson  |                       | MD               |             |                                          |                                                         | COVID-19 Prevention Network                                                                |
| Kelly                             | Kush       |                       |                  |             |                                          |                                                         | COVID-19 Prevention Network                                                                |
| Lori                              | Nesbitt    |                       |                  |             |                                          |                                                         | COVID-19 Prevention Network                                                                |
| Cora                              | Sonnier    |                       |                  |             |                                          |                                                         | COVID-19 Prevention Network                                                                |
| Jennifer                          | McCarter   |                       |                  |             |                                          |                                                         | COVID-19 Prevention Network                                                                |
| Michael B.                        | Butcher    |                       | MD               |             |                                          |                                                         | COVID-19 Prevention Network                                                                |
| James                             | Fry        |                       | PA-C             |             |                                          |                                                         | COVID-19 Prevention Network                                                                |
| Donna                             | Percy      |                       | RN, BSN          |             |                                          |                                                         | COVID-19 Prevention Network                                                                |
| Karen                             | Freudemann |                       |                  |             |                                          |                                                         | COVID-19 Prevention Network                                                                |
| Bruce C.                          | Gebhardt   |                       | MD               |             |                                          |                                                         | COVID-19 Prevention Network                                                                |
| Padma N.                          | Mangu      |                       | MD               |             |                                          |                                                         | COVID-19 Prevention Network                                                                |
| Debra B.                          | Schroeck   |                       | MS, PA-C         |             |                                          |                                                         | COVID-19 Prevention Network                                                                |
| Rajesh K.                         | Davit      |                       | MD               |             |                                          |                                                         | COVID-19 Prevention Network                                                                |
| Gayle D.                          | Hennekes   |                       | PA-C, MPAS       |             |                                          |                                                         | COVID-19 Prevention Network                                                                |
| Benjamin J.                       | Luft       |                       | MD               |             |                                          |                                                         | COVID-19 Prevention Network                                                                |
| Melissa                           | Carr       |                       | BA               |             |                                          |                                                         | COVID-19 Prevention Network                                                                |
| Sharon                            | Nachman    |                       | MD               |             |                                          |                                                         | COVID-19 Prevention Network                                                                |
| Alison                            | Pellecchia |                       | BA               |             |                                          |                                                         | COVID-19 Prevention Network                                                                |
| Candace                           | Smith      |                       | PharmD           |             |                                          |                                                         | COVID-19 Prevention Network                                                                |
| Bruno                             | Valenti    |                       | NP               |             |                                          |                                                         | COVID-19 Prevention Network                                                                |
| Maria I.                          | Bermudez   |                       | MD               |             |                                          |                                                         | COVID-19 Prevention Network                                                                |
| Noris                             | Peraita    |                       | ARNP             |             |                                          |                                                         | COVID-19 Prevention Network                                                                |
| Ernesto                           | Delgado    |                       | ARNP             |             |                                          |                                                         | COVID-19 Prevention Network                                                                |
| Alicia                            | Arrazcaeta |                       |                  |             |                                          |                                                         | COVID-19 Prevention Network                                                                |
| Natalie                           | Ramirez    |                       |                  |             |                                          |                                                         | COVID-19 Prevention Network                                                                |
| Carmen                            | Amador     |                       | ARNP             |             |                                          |                                                         | COVID-19 Prevention Network                                                                |
| Horacio                           | Marafioti  |                       | MD               |             |                                          |                                                         | COVID-19 Prevention Network                                                                |
| Lyly                              | Dang       |                       | DNP-BC           |             |                                          |                                                         | COVID-19 Prevention Network                                                                |
| Lauren                            | Clement    |                       | NP-C             |             |                                          |                                                         | COVID-19 Prevention Network                                                                |
| Jennifer                          | Berry      |                       | FNP-BC           |             |                                          |                                                         | COVID-19 Prevention Network                                                                |
| Mohammed                          | Allaw      |                       | MD               |             |                                          |                                                         | COVID-19 Prevention Network                                                                |
| Georgettea                        | Geuss      |                       |                  |             |                                          |                                                         | COVID-19 Prevention Network                                                                |
| Chelsea                           | Miles      |                       | NP               |             |                                          |                                                         | COVID-19 Prevention Network                                                                |
| Zachary                           | Bittner    |                       |                  |             |                                          |                                                         | COVID-19 Prevention Network                                                                |
| Melody                            | Werne      |                       |                  |             |                                          |                                                         | COVID-19 Prevention Network                                                                |
| Cornell                           | Calinescu  |                       | MD               |             |                                          |                                                         | COVID-19 Prevention Network                                                                |
| Shannon                           | Rodman     |                       |                  |             |                                          |                                                         | COVID-19 Prevention Network                                                                |
| Joshua                            | Rindt      |                       |                  |             |                                          |                                                         | COVID-19 Prevention Network                                                                |
| Erin                              | Cooksey    |                       | MD               |             |                                          |                                                         | COVID-19 Prevention Network                                                                |

## Supplemental Online Content: Nonauthor Collaborators

\*First name, last name, and suffix (if applicable) are required and will appear in PubMed.

| *First Name and Middle Initial(s) | *Last Name | *Suffix (eg, Jr, III) | Academic Degrees | Institution | Location (city, state/province, country) | Role or Contribution, eg, chair, principal investigator | Group (if more than 1 Group listed in the byline) and/or Subgroup (eg, Steering Committee) |
|-----------------------------------|------------|-----------------------|------------------|-------------|------------------------------------------|---------------------------------------------------------|--------------------------------------------------------------------------------------------|
| Kristina                          | Harrison   |                       |                  |             |                                          |                                                         | COVID-19 Prevention Network                                                                |
| Deanna                            | Cooper     |                       |                  |             |                                          |                                                         | COVID-19 Prevention Network                                                                |
| Manisha                           | Horton     |                       |                  |             |                                          |                                                         | COVID-19 Prevention Network                                                                |
| Amanda                            | Philyaw    |                       |                  |             |                                          |                                                         | COVID-19 Prevention Network                                                                |
| William                           | Jennings   |                       | MD               |             |                                          |                                                         | COVID-19 Prevention Network                                                                |
| Hilario                           | Alvarado   |                       | MD               |             |                                          |                                                         | COVID-19 Prevention Network                                                                |
| Michele                           | Baka       |                       | MD               |             |                                          |                                                         | COVID-19 Prevention Network                                                                |
| Malina                            | Regalado   |                       | NP               |             |                                          |                                                         | COVID-19 Prevention Network                                                                |
| Linda                             | Murray     |                       | DO               |             |                                          |                                                         | COVID-19 Prevention Network                                                                |
| Sherif                            | Naguib     |                       | MD               |             |                                          |                                                         | COVID-19 Prevention Network                                                                |
| Justin                            | Singletary |                       |                  |             |                                          |                                                         | COVID-19 Prevention Network                                                                |
| Sha-Wanda                         | Richmond   |                       |                  |             |                                          |                                                         | COVID-19 Prevention Network                                                                |
| Sarah                             | Omodele    |                       |                  |             |                                          |                                                         | COVID-19 Prevention Network                                                                |
| Emily                             | Oppenheim  |                       |                  |             |                                          |                                                         | COVID-19 Prevention Network                                                                |
| Laura                             | Pearlman   |                       | MD               |             |                                          |                                                         | COVID-19 Prevention Network                                                                |
| Reuben                            | Martinez   |                       |                  |             |                                          |                                                         | COVID-19 Prevention Network                                                                |
| Victoria                          | Andriulis  |                       |                  |             |                                          |                                                         | COVID-19 Prevention Network                                                                |
| Leonard                           | Singer     |                       | MD               |             |                                          |                                                         | COVID-19 Prevention Network                                                                |
| Jeanne                            | Blevins    |                       |                  |             |                                          |                                                         | COVID-19 Prevention Network                                                                |
| Meagan                            | Thomas     |                       |                  |             |                                          |                                                         | COVID-19 Prevention Network                                                                |
| Christine                         | Hull       |                       |                  |             |                                          |                                                         | COVID-19 Prevention Network                                                                |
| Isabel                            | Pereira    |                       | MD               |             |                                          |                                                         | COVID-19 Prevention Network                                                                |
| Gina                              | Rivero     |                       |                  |             |                                          |                                                         | COVID-19 Prevention Network                                                                |
| Tracy                             | Okonya     |                       |                  |             |                                          |                                                         | COVID-19 Prevention Network                                                                |
| Frances                           | Downing    |                       |                  |             |                                          |                                                         | COVID-19 Prevention Network                                                                |
| Paulina                           | Miller     |                       |                  |             |                                          |                                                         | COVID-19 Prevention Network                                                                |
| Margaret                          | Rhee       |                       | MD               |             |                                          |                                                         | COVID-19 Prevention Network                                                                |
| Katherine                         | Stapleton  |                       |                  |             |                                          |                                                         | COVID-19 Prevention Network                                                                |
| Jeffrey                           | Klein      |                       |                  |             |                                          |                                                         | COVID-19 Prevention Network                                                                |
| Rosamond                          | Hong       |                       | MD               |             |                                          |                                                         | COVID-19 Prevention Network                                                                |
| Suzanne                           | Swan       |                       | MD               |             |                                          |                                                         | COVID-19 Prevention Network                                                                |
| Tami                              | Wahlin     |                       | MD               |             |                                          |                                                         | COVID-19 Prevention Network                                                                |
| Elizabeth                         | Bennett    |                       | PA               |             |                                          |                                                         | COVID-19 Prevention Network                                                                |
| Amy                               | Salzl      |                       |                  |             |                                          |                                                         | COVID-19 Prevention Network                                                                |
| Sharine                           | Phan       |                       |                  |             |                                          |                                                         | COVID-19 Prevention Network                                                                |
| Jewel J.                          | White      |                       | MD               |             |                                          |                                                         | COVID-19 Prevention Network                                                                |
| Amanda                            | Occhino    |                       |                  |             |                                          |                                                         | COVID-19 Prevention Network                                                                |
| Ruth                              | Paiano     |                       | APRN             |             |                                          |                                                         | COVID-19 Prevention Network                                                                |
| Morgan                            | McLaughlin |                       | APRN             |             |                                          |                                                         | COVID-19 Prevention Network                                                                |
| Elisa                             | Swieboda   |                       | APRN             |             |                                          |                                                         | COVID-19 Prevention Network                                                                |

## Supplemental Online Content: Nonauthor Collaborators

\*First name, last name, and suffix (if applicable) are required and will appear in PubMed.

| *First Name and Middle Initial(s) | *Last Name        | *Suffix (eg, Jr, III) | Academic Degrees | Institution | Location (city, state/province, country) | Role or Contribution, eg, chair, principal investigator | Group (if more than 1 Group listed in the byline) and/or Subgroup (eg, Steering Committee) |
|-----------------------------------|-------------------|-----------------------|------------------|-------------|------------------------------------------|---------------------------------------------------------|--------------------------------------------------------------------------------------------|
| Veronica                          | Garcia-Fragoso    |                       | MD               |             |                                          |                                                         | COVID-19 Prevention Network                                                                |
| Maria G.                          | Becerra           |                       | MD               |             |                                          |                                                         | COVID-19 Prevention Network                                                                |
| Toni                              | White             |                       |                  |             |                                          |                                                         | COVID-19 Prevention Network                                                                |
| Christine B.                      | Turley            |                       | MD               |             |                                          |                                                         | COVID-19 Prevention Network                                                                |
| Andrew                            | McWilliams        |                       | MD               |             |                                          |                                                         | COVID-19 Prevention Network                                                                |
| Tiffany                           | Esinhart          |                       | PA-C             |             |                                          |                                                         | COVID-19 Prevention Network                                                                |
| Natasha                           | Montoya           |                       | APRN             |             |                                          |                                                         | COVID-19 Prevention Network                                                                |
| Shamika                           | Huskey            |                       | FNP              |             |                                          |                                                         | COVID-19 Prevention Network                                                                |
| Leena                             | Paul              |                       | FNP              |             |                                          |                                                         | COVID-19 Prevention Network                                                                |
| Karen                             | Tashima           |                       | MD               |             |                                          |                                                         | COVID-19 Prevention Network                                                                |
| Jennie                            | Johnson           |                       | MD               |             |                                          |                                                         | COVID-19 Prevention Network                                                                |
| Marguerite                        | Neill             |                       | MD               |             |                                          |                                                         | COVID-19 Prevention Network                                                                |
| Martha                            | Sanchez           |                       | MD               |             |                                          |                                                         | COVID-19 Prevention Network                                                                |
| Natasha                           | Rybak             |                       | MD               |             |                                          |                                                         | COVID-19 Prevention Network                                                                |
| Maria                             | Mileno            |                       | MD               |             |                                          |                                                         | COVID-19 Prevention Network                                                                |
| Stuart H.                         | Cohen             |                       | MD               |             |                                          |                                                         | COVID-19 Prevention Network                                                                |
| Monica                            | Ruiz              |                       |                  |             |                                          |                                                         | COVID-19 Prevention Network                                                                |
| Dean M.                           | Boswell           |                       | BS               |             |                                          |                                                         | COVID-19 Prevention Network                                                                |
| Elizabeth E.                      | Robison           |                       | BS               |             |                                          |                                                         | COVID-19 Prevention Network                                                                |
| Trina L.                          | Reynolds          |                       | BS               |             |                                          |                                                         | COVID-19 Prevention Network                                                                |
| Sonja                             | Neumeister        |                       | MPH              |             |                                          |                                                         | COVID-19 Prevention Network                                                                |
| Carmen D.                         | Zorrilla          |                       | MD               |             |                                          |                                                         | COVID-19 Prevention Network                                                                |
| Juana                             | Rivera            |                       | MD, MPH          |             |                                          |                                                         | COVID-19 Prevention Network                                                                |
| Jessica                           | Ibarra            |                       | MD               |             |                                          |                                                         | COVID-19 Prevention Network                                                                |
| Iris                              | García            |                       | BSN, RN          |             |                                          |                                                         | COVID-19 Prevention Network                                                                |
| Dianca                            | Sierra            |                       | BA               |             |                                          |                                                         | COVID-19 Prevention Network                                                                |
| Wanda                             | Ramon             |                       | BSPH             |             |                                          |                                                         | COVID-19 Prevention Network                                                                |
| Suzanne                           | Fiorillo          |                       | MSPH             |             |                                          |                                                         | COVID-19 Prevention Network                                                                |
| Rebecca                           | Pitotti           |                       | RNP              |             |                                          |                                                         | COVID-19 Prevention Network                                                                |
| Victoria R.                       | Anderson          |                       | MS               |             |                                          |                                                         | COVID-19 Prevention Network                                                                |
| Jose                              | Castillo Mancilla |                       | MD               |             |                                          |                                                         | COVID-19 Prevention Network                                                                |
| Nga                               | Le                |                       | PharmD           |             |                                          |                                                         | COVID-19 Prevention Network                                                                |
| Patricia L.                       | Winokur           |                       | MD               |             |                                          |                                                         | COVID-19 Prevention Network                                                                |
| Dilek                             | Ince              |                       | MD               |             |                                          |                                                         | COVID-19 Prevention Network                                                                |
| Theresa                           | Hegmann           |                       | PA               |             |                                          |                                                         | COVID-19 Prevention Network                                                                |
| Jeffrey                           | Meier             |                       | MD               |             |                                          |                                                         | COVID-19 Prevention Network                                                                |
| Jack                              | Stapleton         |                       | MD               |             |                                          |                                                         | COVID-19 Prevention Network                                                                |
| Laura                             | Stulken           |                       | PA               |             |                                          |                                                         | COVID-19 Prevention Network                                                                |
| Monica                            | McArthur          |                       | MD, PhD          |             |                                          |                                                         | COVID-19 Prevention Network                                                                |
| Andrea                            | Berry             |                       | MD               |             |                                          |                                                         | COVID-19 Prevention Network                                                                |

## Supplemental Online Content: Nonauthor Collaborators

\*First name, last name, and suffix (if applicable) are required and will appear in PubMed.

| *First Name and Middle Initial(s) | *Last Name   | *Suffix (eg, Jr, III) | Academic Degrees | Institution | Location (city, state/province, country) | Role or Contribution, eg, chair, principal investigator | Group (if more than 1 Group listed in the byline) and/or Subgroup (eg, Steering Committee) |
|-----------------------------------|--------------|-----------------------|------------------|-------------|------------------------------------------|---------------------------------------------------------|--------------------------------------------------------------------------------------------|
| Milagritos                        | Tapia        |                       | MD               |             |                                          |                                                         | COVID-19 Prevention Network                                                                |
| Elizabeth                         | Hammershaimb |                       | MD, MS           |             |                                          |                                                         | COVID-19 Prevention Network                                                                |
| Toni                              | Robinson     |                       | RN               |             |                                          |                                                         | COVID-19 Prevention Network                                                                |
| Rosa                              | MacBryde     |                       | RN               |             |                                          |                                                         | COVID-19 Prevention Network                                                                |
| Susan                             | Kline        |                       | MD, MPH          |             |                                          |                                                         | COVID-19 Prevention Network                                                                |
| Joanne L.                         | Billings     |                       | MD, MPH          |             |                                          |                                                         | COVID-19 Prevention Network                                                                |
| Winston                           | Cavert       |                       | MD               |             |                                          |                                                         | COVID-19 Prevention Network                                                                |
| Les B.                            | Forgosh      |                       | MD               |             |                                          |                                                         | COVID-19 Prevention Network                                                                |
| Timothy W.                        | Schacker     |                       | MD               |             |                                          |                                                         | COVID-19 Prevention Network                                                                |
| Tyler D.                          | Bold         |                       | MD, PhD          |             |                                          |                                                         | COVID-19 Prevention Network                                                                |
| Dima                              | Dandachi     |                       | MD, MPH          |             |                                          |                                                         | COVID-19 Prevention Network                                                                |
| Taylor                            | Nelson       |                       | DO               |             |                                          |                                                         | COVID-19 Prevention Network                                                                |
| Andres                            | Bran         |                       | MD               |             |                                          |                                                         | COVID-19 Prevention Network                                                                |
| Grant                             | Geiger       |                       |                  |             |                                          |                                                         | COVID-19 Prevention Network                                                                |
| S. Hasan                          | Naqvi        |                       | MD               |             |                                          |                                                         | COVID-19 Prevention Network                                                                |
| Diana F.                          | Florescu     |                       | MD               |             |                                          |                                                         | COVID-19 Prevention Network                                                                |
| Richard                           | Starlin      |                       | MD               |             |                                          |                                                         | COVID-19 Prevention Network                                                                |
| David                             | Kline        |                       | MD               |             |                                          |                                                         | COVID-19 Prevention Network                                                                |
| Andrea                            | Zimmer       |                       | MD               |             |                                          |                                                         | COVID-19 Prevention Network                                                                |
| Anum                              | Abbas        |                       | MD               |             |                                          |                                                         | COVID-19 Prevention Network                                                                |
| Natasha                           | Wilson       |                       | APRN             |             |                                          |                                                         | COVID-19 Prevention Network                                                                |
| Joseph J.                         | Eron         |                       | MD               |             |                                          |                                                         | COVID-19 Prevention Network                                                                |
| Michael                           | Sciaudone    |                       | MD, MPH          |             |                                          |                                                         | COVID-19 Prevention Network                                                                |
| A. Lina                           | Rosengren    |                       | MD, MPH, MS      |             |                                          |                                                         | COVID-19 Prevention Network                                                                |
| John S.                           | Kizer        |                       | MD               |             |                                          |                                                         | COVID-19 Prevention Network                                                                |
| Sarah E.                          | Rutstein     |                       | MD, PhD          |             |                                          |                                                         | COVID-19 Prevention Network                                                                |
| Carina A.                         | Rodriguez    |                       | MD               |             |                                          |                                                         | COVID-19 Prevention Network                                                                |
| Elizabeth                         | Bruce        |                       | MD               |             |                                          |                                                         | COVID-19 Prevention Network                                                                |
| Lisa J.                           | Sanders      |                       | MD               |             |                                          |                                                         | COVID-19 Prevention Network                                                                |
| Kami                              | Kim          |                       | MD               |             |                                          |                                                         | COVID-19 Prevention Network                                                                |
| Denise                            | Casey        |                       | RN               |             |                                          |                                                         | COVID-19 Prevention Network                                                                |
| Barbara S.                        | Taylor       |                       | MD, MS           |             |                                          |                                                         | COVID-19 Prevention Network                                                                |
| Thomas                            | Patterson    |                       | MD               |             |                                          |                                                         | COVID-19 Prevention Network                                                                |
| Ruth S.                           | Pinilla      |                       | MD               |             |                                          |                                                         | COVID-19 Prevention Network                                                                |
| Delia                             | Bullock      |                       | MD               |             |                                          |                                                         | COVID-19 Prevention Network                                                                |
| Philip                            | Ponce        |                       | MD               |             |                                          |                                                         | COVID-19 Prevention Network                                                                |
| Jan                               | Patterson    |                       | MD               |             |                                          |                                                         | COVID-19 Prevention Network                                                                |
| R. Scott                          | McClelland   |                       | MD, MPH          |             |                                          |                                                         | COVID-19 Prevention Network                                                                |
| Dakotah C.                        | Lane         |                       | MD               |             |                                          |                                                         | COVID-19 Prevention Network                                                                |

## Supplemental Online Content: Nonauthor Collaborators

\*First name, last name, and suffix (if applicable) are required and will appear in PubMed.

| *First Name and Middle Initial(s) | *Last Name | *Suffix (eg, Jr, III) | Academic Degrees | Institution | Location (city, state/province, country) | Role or Contribution, eg, chair, principal investigator | Group (if more than 1 Group listed in the byline) and/or Subgroup (eg, Steering Committee) |
|-----------------------------------|------------|-----------------------|------------------|-------------|------------------------------------------|---------------------------------------------------------|--------------------------------------------------------------------------------------------|
| Anna                              | Wald       |                       | MD, MPH          |             |                                          |                                                         | COVID-19 Prevention Network                                                                |
| Frank                             | James      |                       | MD               |             |                                          |                                                         | COVID-19 Prevention Network                                                                |
| Elizabeth                         | Duke       |                       | MD               |             |                                          |                                                         | COVID-19 Prevention Network                                                                |
| Kirsten                           | Hauge      |                       | MPH              |             |                                          |                                                         | COVID-19 Prevention Network                                                                |
| Jessica                           | Heimonen   |                       | MPH              |             |                                          |                                                         | COVID-19 Prevention Network                                                                |
| Erin A.                           | Goecker    |                       | MS               |             |                                          |                                                         | COVID-19 Prevention Network                                                                |
| Youyi                             | Fong       |                       | PhD              |             |                                          |                                                         | COVID-19 Prevention Network                                                                |
| Carol                             | Kauffman   |                       | MD               |             |                                          |                                                         | COVID-19 Prevention Network                                                                |
| Kathleen                          | Linder     |                       | MD               |             |                                          |                                                         | COVID-19 Prevention Network                                                                |
| Kimberly                          | Nofz       |                       | BSN              |             |                                          |                                                         | COVID-19 Prevention Network                                                                |
| Andrew                            | McConnell  |                       | BS               |             |                                          |                                                         | COVID-19 Prevention Network                                                                |
| Robert J.                         | Buynak     |                       | MD               |             |                                          |                                                         | COVID-19 Prevention Network                                                                |
| Angella                           | Webb       |                       | APRN             |             |                                          |                                                         | COVID-19 Prevention Network                                                                |
| Taryn                             | Petty      |                       | FNP              |             |                                          |                                                         | COVID-19 Prevention Network                                                                |
| Stephanie                         | Andree     |                       | FNP              |             |                                          |                                                         | COVID-19 Prevention Network                                                                |
| Erica                             | Sanchez    |                       |                  |             |                                          |                                                         | COVID-19 Prevention Network                                                                |
| Nolan                             | Mackey     |                       |                  |             |                                          |                                                         | COVID-19 Prevention Network                                                                |
| Clarisse                          | Baudelaire |                       |                  |             |                                          |                                                         | COVID-19 Prevention Network                                                                |
| Jaleh                             | Ostovar    |                       | NP               |             |                                          |                                                         | COVID-19 Prevention Network                                                                |
| Sarah                             | Dzigiell   |                       |                  |             |                                          |                                                         | COVID-19 Prevention Network                                                                |
| Adrienna                          | Marquez    |                       |                  |             |                                          |                                                         | COVID-19 Prevention Network                                                                |
| Hanh                              | Chu        |                       |                  |             |                                          |                                                         | COVID-19 Prevention Network                                                                |
| Kia                               | Lee        |                       |                  |             |                                          |                                                         | COVID-19 Prevention Network                                                                |
| Kim                               | Quillin    |                       |                  |             |                                          |                                                         | COVID-19 Prevention Network                                                                |
| Barbara                           | Rizzardi   |                       | MD               |             |                                          |                                                         | COVID-19 Prevention Network                                                                |
| Michelle                          | King       |                       | NP               |             |                                          |                                                         | COVID-19 Prevention Network                                                                |
| Vanessa                           | Abad       |                       | NP               |             |                                          |                                                         | COVID-19 Prevention Network                                                                |
| Jennifer                          | Knowles    |                       | BS               |             |                                          |                                                         | COVID-19 Prevention Network                                                                |
| Michael                           | Waters     |                       | MD               |             |                                          |                                                         | COVID-19 Prevention Network                                                                |
| Karla                             | Zepeda     |                       | NP               |             |                                          |                                                         | COVID-19 Prevention Network                                                                |
| Jordan                            | Coslet     |                       | NP               |             |                                          |                                                         | COVID-19 Prevention Network                                                                |
| Dalia                             | Tovar      |                       | MA               |             |                                          |                                                         | COVID-19 Prevention Network                                                                |
| Marian E.                         | Shaw       |                       | MD               |             |                                          |                                                         | COVID-19 Prevention Network                                                                |
| Mark A.                           | Turner     |                       | MD               |             |                                          |                                                         | COVID-19 Prevention Network                                                                |
| Cory J.                           | Huffine    |                       | FNP-C            |             |                                          |                                                         | COVID-19 Prevention Network                                                                |
| Esther S.                         | Huffine    |                       | FNP-C            |             |                                          |                                                         | COVID-19 Prevention Network                                                                |
| Julie A.                          | Ake        |                       | MD, MSc          |             |                                          |                                                         | COVID-19 Prevention Network                                                                |
| Elizabeth                         | Secord     |                       | MD               |             |                                          |                                                         | COVID-19 Prevention Network                                                                |
| Eric                              | McGrath    |                       | MD               |             |                                          |                                                         | COVID-19 Prevention Network                                                                |
| Phillip                           | Levy       |                       | MD               |             |                                          |                                                         | COVID-19 Prevention Network                                                                |

Supplemental Online Content: Nonauthor Collaborators

\*First name, last name, and suffix (if applicable) are required and will appear in PubMed.

| *First Name and Middle Initial(s) | *Last Name  | *Suffix (eg, Jr, III) | Academic Degrees | Institution | Location (city, state/province, country) | Role or Contribution, eg, chair, principal investigator | Group (if more than 1 Group listed in the byline) and/or Subgroup (eg, Steering Committee) |
|-----------------------------------|-------------|-----------------------|------------------|-------------|------------------------------------------|---------------------------------------------------------|--------------------------------------------------------------------------------------------|
| Brittany                          | Stewart     |                       | RD, PharmD       |             |                                          |                                                         | COVID-19 Prevention Network                                                                |
| Charnell                          | Cromer      |                       | RN, MSN          |             |                                          |                                                         | COVID-19 Prevention Network                                                                |
| Ayanna                            | Walters     |                       | RN, BSN          |             |                                          |                                                         | COVID-19 Prevention Network                                                                |
| Grant                             | Ellsworth   |                       | MD, MS           |             |                                          |                                                         | COVID-19 Prevention Network                                                                |
| Caroline                          | Greene      |                       | ANP-BC           |             |                                          |                                                         | COVID-19 Prevention Network                                                                |
| Sarah                             | Galloway    |                       | BA               |             |                                          |                                                         | COVID-19 Prevention Network                                                                |
| Shashi                            | Kapadia     |                       | MD, MS           |             |                                          |                                                         | COVID-19 Prevention Network                                                                |
| Elliot                            | DeHaan      |                       | MD               |             |                                          |                                                         | COVID-19 Prevention Network                                                                |
| Clint                             | Wilson      |                       | MD               |             |                                          |                                                         | COVID-19 Prevention Network                                                                |
| Jason                             | Milligan    |                       | MD               |             |                                          |                                                         | COVID-19 Prevention Network                                                                |
| Danielle                          | Raley       |                       | MD               |             |                                          |                                                         | COVID-19 Prevention Network                                                                |
| Joseph                            | Bocchini    |                       | MD               |             |                                          |                                                         | COVID-19 Prevention Network                                                                |
| Bruce                             | McClenathan |                       | MD               |             |                                          |                                                         | COVID-19 Prevention Network                                                                |
| Mary                              | Hussain     |                       | BS               |             |                                          |                                                         | COVID-19 Prevention Network                                                                |
| Evelyn                            | Lomasney    |                       | MD               |             |                                          |                                                         | COVID-19 Prevention Network                                                                |
| Evelyn                            | Hall        |                       | MMS, PA-C        |             |                                          |                                                         | COVID-19 Prevention Network                                                                |
| Sherry                            | Lamberth    |                       | PharmD           |             |                                          |                                                         | COVID-19 Prevention Network                                                                |
| Christy                           | Schmeck     |                       |                  |             |                                          |                                                         | COVID-19 Prevention Network                                                                |
| Vickie                            | Leathers    |                       |                  |             |                                          |                                                         | COVID-19 Prevention Network                                                                |
