# Supplementary material for: SARS-CoV-2 Viral Load in the Nasopharynx at Time of First Infection Among Unvaccinated Individuals: A Secondary Cross-Protocol Analysis of 4 Randomized Trials
Source: PubMed Central journal article supplement (PMC11117088; doi:10.1001/jamanetworkopen.2024.12835), 2024-05-23
Supplement: jamanetwopen-e2412835-s003.pdf [file jamanetwopen-e2412835-s003.pdf]

## Data Sharing Statement

Fisher. SARS-CoV-2 Viral Load in the Nasopharynx at Time of First Infection Among Unvaccinated Individuals. *JAMA Netw Open*. Published May 23, 2024.

doi:10.1001/jamanetworkopen.2024.12835

### Data

**Data available:** No

### Additional Information

**Explanation for why data not available:** The data availability will be at the discretion of the original study sponsors.
